# Supplementary material for: Genetic and Environmental Determinants of Immune Response to Cutaneous Melanoma
Source: Oxford University Press journal article supplement (doi:10.1158/0008-5472.can-18-2864), 2019-02-17
Supplement: 00085472can182864-sup-208638_2_supp_5262629_pkzk3v.xlsx [file 00085472can182864-sup-208638_2_supp_5262629_pkzk3v.xlsx]

## Sheet: X
List of 70 genes shared between the three immune subgroups signature and TCGA classes
Gene name
AIM2
BANK1
BTLA
CCL19
CCL21
CCL7
CCR4
CD1C
CD2
CD247
CD27
CD38
CD3D
CD3E
CD3G
CD6
CD7
CD8A
CPA3
CRTAM
CTSG
CXCR5
FASLG
FCER2
FCRL1
FCRL2
FCRL3
FCRL5
FST
GPR114
GZMH
IFNG
IL21R
IL7R
ITK
JAKMIP1
KLRC1
KLRD1
KLRK1
KRT1
KRT80
LAX1
LCK
LILRA4
MAL
MARCO
P2RY10
PAX5
PDCD1
PIK3CG
PNOC
PTPRC
PYHIN1
SELP
SIT1
SKAP1
SLA2
SLAMF1
SLAMF6
STAP1
TARP
TBX21
TIGIT
TIMD4
TNFRSF17
TNFRSF9
TRAT1
UBASH3A
UBD
ZAP70

## Sheet: A
The top enriched pathways in the Low Immune Subgroup. “GeneSet” is the pathway name, “Ratio of protein in Geneset” indicates ratios of numbers of genes contained in pathways to total genes in the Reactome FI network; “Number of protein in GeneSet” is the number of proteins within a given pathway; and “Protein from network” indicates number of genes from the input gene list per pathway
GeneSet	RatioOfProteinInGeneSet	NumberOfProteinInGeneSet	ProteinFromNetwork	P-value	FDR	Nodes
The citric acid (TCA) cycle and respiratory electron transport(R)	0.0148	161	66	1.1102e-16	5.2736e-14	ATP5C1,UQCRC1,UQCRC2,ECSIT,DLD,ATP5A1,SLC16A1,UQCRB,UQCRH,UQCRQ,NDUFC1,NDUFB9,NDUFB7,NDUFB3,NDUFB2,NDUFA8,NDUFA7,NDUFA4,NDUFA1,SUCLA2,BSG,ATP5S,ATP5J,ATP5H,ATP5O,ATP5E,ATP5D,NDUFAF2,NDUFAF1,COX7B,COX7C,COX8A,COX5B,COX5A,COX6C,NDUFAB1,TACO1,COX6A1,SDHC,COX6B1,NDUFB11,COX11,CYC1,PDHA1,CYCS,UQCRFS1,NDUFS5,NDUFS4,NDUFS2,NDUFS1,LRPPRC,IDH3A,PDK2,PDHX,COX7A2L,SUCLG1,TRAP1,DLAT,PDP2,NDUFA13,NDUFA11,NDUF…
Mitochondrial translation(R)	0.0085	92	58	1.1102e-16	5.2736e-14	MRPL19,MRPL16,MRPL14,MRPL15,MRPL12,MRPL13,MRPL10,MRPL11,MRPL27,MRPL28,MRPL23,MRPL24,MRPL21,MRPL30,MRPL36,MRPL34,MRPL35,MRPL32,MRPL33,MRPL42,MRPL40,MRPL48,MRPL45,MRPL46,MRPL43,MRPL53,MRPL51,MRPL4,MRPL3,MRPL2,MRPL1,MRPL9,GADD45GIP1,MRPS17,MRPS15,MRPS28,MRPS26,MRPS27,MRPS24,MRPS23,MRPS2,MRPS21,MRPS7,MRPS5,MRPS9,MRPS35,MRPS36,MRPS33,MRPS34,MRPS30,MRPS18B,MRPS18A,GFM2,MRRF,TUFM,DAP3,TSFM,MTIF2
Ribosome(K)	0.0142	154	59	1.3212e-14	4.1749e-12	MRPL19,MRPL16,MRPL14,MRPL15,MRPL12,MRPL13,MRPL10,MRPL11,MRPL27,MRPL28,MRPL23,MRPL24,MRPL21,MRPL30,RPLP1,RPLP0,MRPL36,MRPL34,MRPL35,MRPL32,MRPL33,MRPL4,MRPL3,MRPL2,MRPL1,MRPL9,RPL23A,MRPS17,MRPS15,MRPS2,MRPS21,MRPS7,MRPS5,MRPS9,RPL26L1,RPL4,RPL32,RPL34,RPL8,RPL6,RPL7,RPL36,RPL39,RPL22,RPL29,RPL12,RPS2,RPL10A,RPS7,RPS5,RPL7A,RPL37A,RPL36A,RPL35A,RPS15,RPS13,MRPS18A,RPS21,RPS3A
Generic Transcription Pathway(R)	0.0455	494	121	9.0261e-14	2.1392e-11	CSNK2A1,CSNK2A2,NR2F6,ZNF45,MED20,PMS2,ATAD2,CENPJ,STK11,CDC25C,MSH2,SMYD2,MNAT1,EXO1,RABGGTB,BIRC5,E2F1,E2F7,NDUFA4,TRIM28,CSNK2B,KCTD15,SUPT4H1,WWTR1,COX7B,BRCA1,COX7C,HNF4A,COX8A,KIT,YAP1,PCNA,COX5B,COX5A,TCEB2,TCEB1,NPM1,COX6C,RPA3,TACO1,COX6A1,COX6B1,CCNB1,COX11,TFAP2A,SUPT5H,CYCS,YWHAE,CHD4,TRIAP1,YWHAQ,YWHAG,TGIF1,TAF9,AURKB,AURKA,TGS1,SSRP1,ERCC3,ERCC2,TAF4,TAF2,GLS,MYC,PIP4K2B,MED1,NEDD4…
rRNA processing(R)	0.0165	179	62	2.1494e-13	4.0838e-11	RPLP1,RPLP0,TRMT112,NSUN4,BYSL,TSR1,ISG20L2,HSD17B10,NOP56,NOP58,RPL23A,NOL11,UTP14A,EXOSC7,EXOSC5,EXOSC4,PES1,EXOSC8,BOP1,DKC1,RPP21,RPP25,DDX49,UTP15,UTP18,RPL4,RPL32,RPL34,RPL8,RPL6,RRP9,RPL7,RPL36,RPL39,RPL22,RPL29,GAR1,PNO1,RIOK2,RPL12,RPS2,WDR18,WDR12,RPL10A,RPS7,RPS5,NHP2,WDR3,RPL7A,NOB1,RPL37A,RPL36A,RPL35A,PWP2,RPS15,RPS13,RPS21,NOL9,EMG1,RPS3A,SENP3,SKIV2L2
Parkinson's disease(K)	0.0131	142	53	7.8038e-13	1.233e-10	ATP5C1,UQCRC1,UQCRC2,GPR37,ATP5A1,UQCRB,UQCRH,UQCRQ,NDUFC1,SLC25A5,SLC25A4,NDUFB9,NDUFB7,NDUFB3,NDUFB2,NDUFA8,NDUFA7,NDUFA4,NDUFA1,ATP5J,ATP5H,ATP5O,ATP5E,ATP5D,COX7B,COX7C,COX8A,COX5B,COX5A,COX6C,NDUFAB1,COX6A1,SDHC,COX6B1,NDUFB11,CYC1,CYCS,UQCRFS1,NDUFS5,NDUFS4,NDUFS2,NDUFS1,COX7A2L,VDAC2,VDAC1,NDUFA13,NDUFA11,NDUFA10,ATP5G3,ATP5G2,ATP5G1,ATP5F1,SNCA
Mitotic Prometaphase(R)	0.0091	99	43	1.004e-12	1.3554e-10	CSNK2A1,CSNK2A2,CDCA5,NCAPG,CDCA8,CENPA,CENPF,APITD1,CENPI,CENPL,CENPM,CENPN,CENPO,CENPQ,NDC80,BIRC5,CSNK2B,KIF2C,MAD2L1,ERCC6L,BUB1B,CCNB2,CCNB1,NUP133,AURKB,SMC4,SEH1L,SKA1,RAD21,PLK1,NUF2,HDAC8,ZW10,ZWINT,AHCTF1,XPO1,RANBP2,KIF18A,CKAP5,ITGB3BP,BUB1,CLASP1,CLASP2
Mitotic Metaphase and Anaphase(R)	0.0151	164	57	1.7606e-12	2.0775e-10	PSMD8,PSMD4,PSMD2,PSMD3,PSME3,CDCA5,CDCA8,CENPA,PSMB7,PSMB4,PSMB5,CENPF,APITD1,CENPI,CENPL,CENPM,CENPN,CENPO,CENPQ,ANAPC5,NDC80,BIRC5,CDC16,KIF2C,MAD2L1,ERCC6L,BUB1B,BANF1,PSMD10,PSMD12,PSMD11,PSMD14,PSMD13,UBE2C,NUP133,AURKB,SEH1L,SKA1,ANAPC11,RAD21,PLK1,NUF2,ESPL1,HDAC8,PPP2R1A,ZW10,ZWINT,AHCTF1,XPO1,RANBP2,PTTG1,KIF18A,CKAP5,ITGB3BP,BUB1,CLASP1,CLASP2
Oxidative phosphorylation(K)	0.0122	133	50	2.6917e-12	2.7765e-10	ATP5C1,UQCRC1,UQCRC2,ATP5A1,UQCRB,UQCRH,UQCRQ,NDUFC1,NDUFB9,NDUFB7,NDUFB3,NDUFB2,NDUFA8,NDUFA7,NDUFA4,NDUFA1,ATP6V1E2,ATP5J,ATP5H,ATP5O,ATP5E,ATP5D,ATP6V1C1,COX7B,COX7C,COX8A,COX5B,COX5A,COX6C,NDUFAB1,COX6A1,SDHC,COX6B1,NDUFB11,COX11,CYC1,UQCRFS1,NDUFS5,NDUFS4,NDUFS2,NDUFS1,COX7A2L,NDUFA13,NDUFA11,NDUFA10,ATP6V1D,ATP5G3,ATP5G2,ATP5G1,ATP5F1
Alzheimer's disease(K)	0.0157	171	58	2.9227e-12	2.7765e-10	ATP5C1,UQCRC1,UQCRC2,EIF2AK3,GRIN2C,ATP5A1,UQCRB,UQCRH,NAE1,UQCRQ,NDUFC1,NDUFB9,NDUFB7,NDUFB3,NDUFB2,HSD17B10,NDUFA8,NDUFA7,NDUFA4,NDUFA1,ATP5J,ATP5H,ATP5O,APH1B,ATP5E,ATP5D,COX7B,COX7C,COX8A,COX5B,COX5A,COX6C,NDUFAB1,COX6A1,SDHC,COX6B1,NDUFB11,CYC1,CYCS,GSK3B,UQCRFS1,NDUFS5,NDUFS4,NDUFS2,NDUFS1,PPP3R1,BACE2,CDK5,COX7A2L,CDK5R1,NDUFA13,NDUFA11,NDUFA10,ATP5G3,ATP5G2,ATP5G1,ATP5F1,SNCA
Huntington's disease(K)	0.0178	193	62	4.8136e-12	4.1397e-10	ATP5C1,UQCRC1,UQCRC2,PPARGC1A,ATP5A1,UQCRB,UQCRH,UQCRQ,NDUFC1,SLC25A5,SLC25A4,NDUFB9,NDUFB7,NDUFB3,NDUFB2,NDUFA8,NDUFA7,NDUFA4,NDUFA1,ATP5J,ATP5H,ATP5O,ATP5E,ATP5D,RCOR1,COX7B,COX7C,COX8A,COX5B,COX5A,COX6C,NDUFAB1,COX6A1,SDHC,COX6B1,NDUFB11,CYC1,CYCS,UQCRFS1,NDUFS5,NDUFS4,NDUFS2,NDUFS1,TAF4,CREB3L4,CLTC,POLR2C,POLR2D,POLR2E,POLR2F,POLR2I,COX7A2L,VDAC2,VDAC1,NDUFA13,NDUFA11,NDUFA10,ATP5G3,ATP5G2,A…
Cell Cycle Checkpoints(R)	0.0151	164	52	3.9457e-10	3.1171e-08	PSMD8,PSMD4,PSMD2,PSMD3,GTSE1,PSME3,PSMB7,PSMB4,PSMB5,CDC25C,CDC25A,ANAPC5,PKMYT1,MCM10,EXO1,HERC2,BRCC3,CDC16,BRCA1,RPA3,MAD2L1,BUB1B,UBE2V2,PSMD10,PSMD12,PSMD11,PSMD14,PSMD13,CCNB2,CCNB1,UBE2C,YWHAE,YWHAQ,YWHAG,RNF8,ANAPC11,CDC7,CDC6,CDK2,RFC5,RFC3,RFC4,MCM3,MCM4,RBBP8,KAT5,CHEK1,DNA2,TP53BP1,CLSPN,H2AFX,WEE1
Eukaryotic Translation Initiation(R)	0.0103	112	41	5.2489e-10	3.8317e-08	RPLP1,RPLP0,EIF1AX,EIF4EBP1,EIF5B,EIF4B,RPL23A,EIF3M,EIF3K,EIF3I,EIF3H,EIF3F,EIF3D,PABPC1,RPL4,RPL32,RPL34,RPL8,RPL6,RPL7,RPL36,RPL39,RPL22,RPL29,RPL12,RPS2,RPL10A,RPS7,RPS5,EIF2B3,EIF2B2,RPL7A,RPL37A,RPL36A,RPL35A,RPS15,RPS13,RPS21,EIF2S2,EIF2S3,RPS3A
Non-alcoholic fatty liver disease (NAFLD)(K)	0.0139	151	48	1.7121e-09	1.1471e-07	AKT2,AKT3,UQCRC1,UQCRC2,EIF2AK3,PKLR,UQCRB,UQCRH,UQCRQ,PIK3CB,NDUFC1,NDUFB9,NDUFB7,NDUFB3,NDUFB2,NDUFA8,NDUFA7,NDUFA4,NDUFA1,PIK3R2,COX7B,COX7C,COX8A,COX5B,COX5A,COX6C,NDUFAB1,COX6A1,SDHC,COX6B1,NDUFB11,CYC1,CYCS,GSK3B,UQCRFS1,NDUFS5,NDUFS4,NDUFS2,NDUFS1,IRS2,MLXIP,COX7A2L,NDUFA13,NDUFA11,NDUFA10,ADIPOR1,ADIPOR2,BAX
S Phase(R)	0.0113	123	42	2.3987e-09	1.5112e-07	PSMD8,PSMD4,PSMD2,PSMD3,PSME3,CDCA5,PSMB7,PSMB4,PSMB5,CDC25A,MNAT1,POLA1,PCNA,RPA3,PSMD10,PSMD12,PSMD11,PSMD14,PSMD13,POLD2,POLE4,POLE2,MYC,RAD21,CDC6,CDK4,CDK2,RFC5,RFC3,RFC4,MCM3,MCM4,SKP2,ESCO1,DNA2,FEN1,GINS1,GINS2,GINS3,LIG1,CKS1B,WEE1
Mitotic G2-G2/M phases(R)	0.016	174	52	2.8086e-09	1.6571e-07	PSMD8,PSMD4,PSMD2,PSMD3,GTSE1,PSME3,DYNLL1,PSMB7,PSMB4,PSMB5,CENPF,CENPJ,NEK2,CDC25C,CDC25A,PKMYT1,TUBGCP5,TUBGCP4,MNAT1,HSP90AB1,FOXM1,E2F1,CETN2,DYNC1I2,DYNC1H1,PSMD10,PSMD12,PSMD11,PSMD14,PSMD13,CCNB2,CCNB1,YWHAE,YWHAG,CCNA2,AURKA,CEP70,CEP76,PLK4,PLK1,PHLDA1,FKBPL,HMMR,CDK2,CEP152,PPP2R1A,TPX2,XPO1,TUBG1,CKAP5,CLASP1,WEE1
Cell cycle(K)	0.0114	124	40	2.5949e-08	1.4272e-06	CDC25C,CDC25A,ANAPC5,PKMYT1,E2F1,CDC16,PCNA,MAD2L1,BUB1B,CCNE2,CCNE1,CCNB3,CCNB2,CCNB1,YWHAE,GSK3B,YWHAQ,YWHAG,CCNA2,MYC,ANAPC13,PRKDC,ANAPC11,RAD21,PLK1,CDC7,CDC6,CDK4,CDK2,TFDP2,ESPL1,MCM3,MCM4,TTK,CHEK1,SKP2,PTTG1,SMAD2,BUB1,WEE1
Mitotic G1-G1/S phases(R)	0.012	130	40	8.8108e-08	4.5816e-06	PSMD8,PSMD4,PSMD2,PSMD3,PSME3,DHFR,PSMB7,PSMB4,PSMB5,CDC25A,MNAT1,MCM10,E2F1,POLA1,PCNA,RPA3,CCNE2,CCNE1,PSMD10,PSMD12,PSMD11,PSMD14,PSMD13,CCNB1,RRM2,POLE4,POLE2,MYC,CDC7,CDC6,CDK4,CDK2,TFDP2,MCM3,MCM4,SKP2,TOP2A,TYMS,CKS1B,WEE1
Nucleotide Excision Repair(R)	0.0094	102	34	1.3425e-07	6.7125e-06	ACTL6A,DDB1,RUVBL1,INO80C,MNAT1,CETN2,PCNA,RPA3,UBE2V2,PPIE,POLD2,ERCC3,ERCC1,ERCC2,ERCC8,GTF2H2,GTF2H4,USP7,CHD1L,COPS4,COPS5,COPS2,COPS8,RFC5,RFC3,RFC4,POLR2C,POLR2D,POLR2E,POLR2F,POLR2I,PRPF19,LIG1,LIG3
SRP-dependent cotranslational protein targeting to membrane(R)	0.0095	103	34	1.6741e-07	7.8681e-06	RPLP1,RPLP0,SRP9,RPL23A,SRP14,RPL4,RPL32,RPL34,RPL8,RPL6,RPL7,RPL36,RPL39,RPL22,RPL29,SSR1,SSR2,SSR3,RPL12,RPS2,SRP68,RPL10A,RPS7,RPS5,RPL7A,RPL37A,RPL36A,SEC11C,RPL35A,RPS15,RPS13,RPS21,SRPRB,RPS3A
Intra-Golgi and retrograde Golgi-to-ER traffic(R)	0.013	141	41	2.6176e-07	1.142e-05	USP6NL,PLA2G6,DYNLL1,PAFAH1B3,PAFAH1B2,STX6,KDELR1,KDELR3,RACGAP1,KIF11,KIF23,KIF2C,DYNC1I2,DYNC1H1,KIF5A,TMED10,KIF3A,KIF3C,KIF4A,USE1,PLA2G4A,DCTN6,GOSR1,CYTH3,GALNT2,GALNT1,COPZ1,NBAS,RAB6A,VPS54,RAB18,VPS45,GOLGA5,COG6,ZW10,TMED3,TRIP11,RAB3GAP2,COPG2,COPA,KIF18A
Cilium Assembly(R)	0.0165	179	48	2.6558e-07	1.142e-05	IFT172,DYNC2LI1,IFT140,DYNLL1,TMEM67,TTC30B,CENPJ,NEK2,ARL6,FBF1,BBS1,CETN2,CCT3,CCT2,DYNC1I2,CCT8,CCT4,DYNC1H1,TTC8,RPGRIP1L,KIF3A,NPHP1,KIF3C,YWHAE,TTC26,IFT52,YWHAG,CEP97,IFT80,IFT88,IFT81,CEP70,CEP76,PLK4,PLK1,WDR34,WDR35,TCP1,EXOC2,CEP152,PPP2R1A,DYNC2H1,CC2D2A,TUBG1,TRIP11,B9D1,CKAP5,CLASP1
Synthesis of DNA(R)	0.009	98	32	4.8047e-07	1.8868e-05	PSMD8,PSMD4,PSMD2,PSMD3,PSME3,PSMB7,PSMB4,PSMB5,POLA1,PCNA,RPA3,PSMD10,PSMD12,PSMD11,PSMD14,PSMD13,POLD2,POLE4,POLE2,CDC6,CDK2,RFC5,RFC3,RFC4,MCM3,MCM4,DNA2,FEN1,GINS1,GINS2,GINS3,LIG1
Selenoamino acid metabolism(R)	0.0095	103	33	4.8378e-07	1.8868e-05	RPLP1,RPLP0,RPL23A,LARS,AIMP2,EEF1E1,AHCY,RPL4,RPL32,RPL34,EPRS,RPL8,RPL6,RPL7,RPL36,RPL39,RPL22,RPL29,RPL12,PAPSS1,RPS2,RPL10A,RPS7,RPS5,IARS,RPL7A,RPL37A,RPL36A,RPL35A,RPS15,RPS13,RPS21,RPS3A
Eukaryotic Translation Termination(R)	0.0079	86	29	8.6958e-07	3.3044e-05	RPLP1,RPLP0,TRMT112,ETF1,RPL23A,GSPT1,RPL4,RPL32,RPL34,RPL8,RPL6,RPL7,RPL36,RPL39,RPL22,RPL29,RPL12,RPS2,RPL10A,RPS7,RPS5,RPL7A,RPL37A,RPL36A,RPL35A,RPS15,RPS13,RPS21,RPS3A
Aurora B signaling(N)	0.0037	40	18	2.3015e-06	8.2855e-05	NCAPG,CDCA8,CENPA,NDC80,BIRC5,KIF20A,RACGAP1,KIF23,KIF2C,NPM1,PEBP1,AURKB,AURKA,SMC4,STMN1,NCL,PPP2R5D,BUB1
Nucleosome assembly(R)	0.0027	29	15	3.0738e-06	9.8887e-05	STRA13,CENPA,APITD1,CENPI,CENPL,CENPM,CENPN,CENPO,CENPQ,RUVBL1,NPM1,HJURP,OIP5,RBBP7,ITGB3BP
mRNA Capping(R)	0.0027	29	15	3.0738e-06	9.8887e-05	MNAT1,SUPT5H,NCBP2,ERCC3,ERCC2,RNMT,GTF2H2,GTF2H4,GTF2F1,GTF2F2,POLR2C,POLR2D,POLR2E,POLR2F,POLR2I
Signaling by Rho GTPases(R)	0.0304	330	70	3.0902e-06	9.8887e-05	CDCA8,IQGAP3,CENPA,CENPF,APITD1,CENPI,CENPL,CENPM,CENPN,CENPO,CENPQ,CDC25C,NDC80,BIRC5,PIK3C3,BAIAP2,PRC1,OPHN1,PIK3R4,PIK3R2,RACGAP1,PTK2,KIF14,WASL,ARHGEF9,CTTN,KIF2C,MYO9A,MAD2L1,ERCC6L,BUB1B,KIF5A,YWHAE,YWHAQ,YWHAG,NUP133,AURKB,NCKAP1,CYFIP1,WIPF2,DEPDC1B,SEH1L,SKA1,PLK1,ARPC1A,NUF2,CIT,FGD1,FGD4,CDH1,RHOBTB1,DVL2,SRGAP1,ZW10,ZWINT,AHCTF1,XPO1,RHOQ,RANBP2,CTNNB1,SYDE1,OCRL,MYH10,KIF18A,DIAPH3…
Nonsense-Mediated Decay (NMD)(R)	0.0099	108	32	3.557e-06	0.00011027	RPLP1,RPLP0,ETF1,RPL23A,EIF4A3,GSPT1,PABPC1,NCBP2,RPL4,RPL32,RPL34,RPL8,RPL6,RPL7,RPL36,RPL39,RPL22,RPL29,RPL12,RPS2,RPL10A,RPS7,RPS5,RPL7A,RPL37A,RPL36A,RPL35A,RPS15,PPP2R1A,RPS13,RPS21,RPS3A
APC/C-mediated degradation of cell cycle proteins(R)	0.0076	83	27	3.9019e-06	0.00011358	PSMD8,PSMD4,PSMD2,PSMD3,PSME3,PSMB7,PSMB4,PSMB5,NEK2,ANAPC5,CDC16,MAD2L1,BUB1B,PSMD10,PSMD12,PSMD11,PSMD14,PSMD13,CCNB1,UBE2C,AURKB,AURKA,ANAPC11,PLK1,CDK2,SKP2,PTTG1
RNA Polymerase I, RNA Polymerase III, and Mitochondrial Transcription(R)	0.0081	88	28	3.9165e-06	0.00011358	POLRMT,MNAT1,ZNRD1,GTF3C1,GTF3C3,TFB2M,CHD4,RRN3,MTA1,TAF1B,MTA3,ERCC3,ERCC2,CD3EAP,GTF2H2,GTF2H4,POLR1A,POLR1B,POLR1C,POLR1D,POLR1E,POLR2E,POLR2F,RBBP7,POLR3E,POLR3G,CBX3,SNAPC3
Mitochondrial protein import(R)	0.0035	38	17	4.6886e-06	0.00012659	GRPEL1,SAMM50,TIMM50,TIMM44,TIMM17A,TIMM9,TIMM10,MTX1,MTX2,TOMM6,TOMM20,TOMM22,CHCHD4,CHCHD5,CHCHD2,CHCHD3,HSPA9
Telomere Maintenance(R)	0.0035	38	17	4.6886e-06	0.00012659	POT1,RUVBL2,RUVBL1,POLA1,PCNA,RPA3,DKC1,POLD2,POLE4,POLE2,NHP2,RFC5,RFC3,RFC4,DNA2,FEN1,LIG1
RNA transport(K)	0.0157	171	43	5.3181e-06	0.00014288	POP5,POP7,POP1,POP4,EIF1AX,EIF4EBP1,EIF3CL,EIF5B,EIF4B,EIF3I,EIF3H,EIF3F,EIF3D,EIF4A3,EIF1B,PABPC5,PABPC1,RPP21,GEMIN5,GEMIN6,RPP25,NUP155,NUP133,NCBP2,TGS1,NUP35,RAN,CYFIP1,NUP93,SEH1L,THOC7,EIF2B3,EIF2B2,EIF4G3,NMD3,XPO1,PRMT5,STRAP,RANBP2,XPOT,EIF2S2,EIF2S3,SENP2
Nucleotide excision repair(K)	0.0043	47	19	5.5541e-06	0.00014288	DDB1,MNAT1,RAD23A,CETN2,PCNA,RPA3,POLD2,POLE4,ERCC3,POLE2,ERCC1,ERCC2,ERCC8,GTF2H2,GTF2H4,RFC5,RFC3,RFC4,LIG1
Validated targets of C-MYC transcriptional activation(N)	0.0069	75	25	5.8291e-06	0.00014288	ACTL6A,RUVBL2,RUVBL1,CDC25A,BIRC5,PEG10,RCC1,NDUFAF2,SUPT3H,NPM1,CCNB1,HMGA1,CAD,TAF9,MTA1,MYC,PRDX3,KAT2A,NCL,CDK4,KAT5,NME2,NME1,HSPD1,BAX
Hedgehog 'off' state(R)	0.0083	90	28	5.8935e-06	0.00014288	IFT172,PSMD8,PSMD4,PSMD2,PSMD3,PSME3,PRKAR2A,IFT140,PSMB7,PSMB4,PSMB5,SMO,FUZ,RPGRIP1L,PSMD10,PSMD12,PSMD11,PSMD14,PSMD13,KIF3A,GSK3B,IFT52,IFT88,GPR161,WDR35,TULP3,DYNC2H1,INTU
Eukaryotic Translation Elongation(R)	0.0078	85	27	5.9535e-06	0.00014288	RPLP1,RPLP0,RPL23A,EEF1G,RPL4,RPL32,RPL34,RPL8,RPL6,RPL7,RPL36,RPL39,RPL22,RPL29,RPL12,RPS2,RPL10A,RPS7,RPS5,RPL7A,RPL37A,RPL36A,RPL35A,RPS15,RPS13,RPS21,RPS3A
FOXM1 transcription factor network(N)	0.0037	40	17	9.0279e-06	0.00020764	CENPA,CENPF,NEK2,FOXM1,BIRC5,CCNE1,CCNB2,CCNB1,CCNA2,AURKB,MYC,PLK1,HSPA1B,CDK4,CDK2,SKP2,CKS1B
E2F transcription factor network(N)	0.0063	69	23	1.3516e-05	0.00031087	DHFR,CDC25A,E2F1,E2F6,E2F7,TRIM28,POLA1,BRCA1,CCNE2,CCNE1,CCNA2,RRM2,MYC,CDC6,KAT2A,CDK2,TFDP2,MCM3,RBBP8,WASF1,PRMT5,TYMS,RANBP1
HDR through Homologous Recombination (HR) or Single Strand Annealing (SSA)(R)	0.0078	85	26	1.6566e-05	0.00036444	PPP4R2,EXO1,HERC2,BRCC3,XRCC2,BRCA1,RPA3,UBE2V2,RNF8,ERCC1,RAD51AP1,PALB2,CDK2,RFC5,RFC3,RFC4,RBBP8,KAT5,CHEK1,TIPIN,DNA2,TP53BP1,RAD51C,EME1,CLSPN,H2AFX
Metabolism of nucleotides(R)	0.0044	48	18	2.5696e-05	0.00056532	UCK2,ATIC,GMPS,DCTPP1,DUT,NUDT1,PPAT,PAICS,CAD,RRM2,PFAS,ADSL,IMPDH2,NME2,NME4,NME1,UMPS,TYMS
Resolution of Abasic Sites (AP sites)(R)	0.0029	31	14	2.841e-05	0.00059662	UNG,APEX1,PCNA,RPA3,POLD2,SMUG1,NTHL1,RFC5,RFC3,RFC4,FEN1,LIG1,LIG3,POLB
DNA replication(K)	0.0033	36	15	3.7065e-05	0.00077837	RNASEH2A,POLA1,PCNA,RPA3,POLD2,POLE4,POLE2,RFC5,RFC3,RFC4,MCM3,MCM4,DNA2,FEN1,LIG1
SUMOylation(R)	0.0098	106	29	4.1142e-05	0.00082284	CDCA8,BIRC5,NOP58,HERC2,NSMCE1,CETN2,BRCA1,PCNA,TFAP2A,NUP155,UBA2,NUP133,AURKB,AURKA,MTA1,NUP35,NUP93,SEH1L,RAD21,PHC1,PCGF2,MITF,TP53BP1,TOP2A,RANBP2,CBX8,CBX4,CBX2,SENP2
M/G1 Transition(R)	0.0078	85	25	4.4431e-05	0.00088862	PSMD8,PSMD4,PSMD2,PSMD3,PSME3,PSMB7,PSMB4,PSMB5,GMNN,MCM10,E2F1,POLA1,RPA3,PSMD10,PSMD12,PSMD11,PSMD14,PSMD13,POLE4,POLE2,CDC7,CDC6,CDK2,MCM3,MCM4
Ribosome biogenesis in eukaryotes(K)	0.0094	102	28	5.2289e-05	0.00099349	POP5,POP7,POP1,POP4,CSNK2A1,CSNK2A2,EIF6,SPATA5,NOP56,NOP58,CSNK2B,UTP14A,DKC1,RPP25,RBM28,UTP15,UTP18,RAN,GAR1,RIOK2,GNL3,NHP2,WDR3,NOB1,PWP2,NMD3,XPO1,EMG1

## Sheet: B
The top enriched pathways in the High Immune Subgroup. “GeneSet” is the pathway name, “Ratio of protein in Geneset” indicates ratios of numbers of genes contained in pathways to total genes in the Reactome FI network; “Number of protein in GeneSet” is the number of proteins within a given pathway; and “Protein from network” indicates number of genes from the input gene list per pathway
GeneSet	RatioOfProteinInGeneSet	NumberOfProteinInGeneSet	ProteinFromNetwork	P-value	FDR	Nodes
Interferon alpha/beta signaling(R)	0.0063	68	42	1.1102e-16	1.9873e-14	JAK1,RNASEL,STAT1,STAT2,PSMB8,SOCS3,SOCS1,PTPN6,IFI35,RSAD2,IFI27,BST2,ISG15,ISG20,ADAR,IRF3,IRF1,IRF2,IRF7,IRF5,IRF9,SAMHD1,MX1,IFNAR2,IFITM3,IFITM1,IFITM2,IFIT1,IFIT3,IFIT2,HLA-B,HLA-C,HLA-A,HLA-F,HLA-E,TYK2,IFI6,OASL,OAS1,OAS2,OAS3,GBP2
Antigen processing and presentation(K)	0.0071	77	39	1.1102e-16	1.9873e-14	RFX5,PSME1,PSME2,HLA-DRB5,HLA-DRB4,HLA-DRB3,HLA-DRB1,HLA-DPA1,HLA-DMA,HLA-DMB,KIR3DL3,HLA-DPB1,HLA-DOA,KIR2DL5A,HLA-DRA,CIITA,IFI30,CTSS,CTSB,CD74,CD8B,KIR2DL4,TAPBP,CD4,HLA-DQA1,KIR2DS3,KIR2DS5,HLA-DQB1,TAP2,TAP1,B2M,HLA-B,HLA-C,HLA-A,HLA-F,HLA-E,KLRC2,KLRC3,KLRC4
Influenza A(K)	0.0161	175	56	1.1102e-16	1.9873e-14	HLA-DRB5,HLA-DRB4,EIF2AK2,EIF2AK4,HLA-DRB3,HLA-DRB1,IKBKB,IKBKE,JAK1,HLA-DPA1,RNASEL,HLA-DMA,HLA-DMB,STAT1,STAT2,HLA-DPB1,HLA-DOA,SOCS3,TNFRSF10A,NFKB1,TNFRSF10D,CXCL10,HLA-DRA,MYD88,CIITA,PIK3CD,CCL2,ICAM1,TNFSF10,RSAD2,PIK3R1,IL18,IL33,IL6,ADAR,DDX58,IRF3,IRF7,IRF9,MX1,HLA-DQA1,IFIH1,IFNGR1,HLA-DQB1,IFNAR2,MAP2K3,PML,TYK2,TLR4,TLR3,FAS,NFKBIA,CASP1,OAS1,OAS2,OAS3
Interferon gamma signaling(R)	0.0067	73	47	1.1102e-16	1.9873e-14	HLA-DRB5,HLA-DRB4,HLA-DRB3,HLA-DRB1,JAK1,HLA-DPA1,PTAFR,STAT1,HLA-DPB1,PIAS1,SOCS3,SOCS1,HLA-DRA,CIITA,PTPN6,IFI30,ICAM1,TRIM26,TRIM21,TRIM22,IRF3,IRF1,IRF2,IRF7,IRF5,IRF9,HLA-DQA1,TRIM8,TRIM5,IFNGR1,HLA-DQB2,HLA-DQB1,PML,B2M,HLA-B,HLA-C,HLA-A,HLA-F,HLA-E,SP100,OASL,OAS1,OAS2,OAS3,GBP2,GBP1,CAMK2G
Signaling by Interleukins(R)	0.0423	460	99	1.1102e-16	1.9873e-14	PSME1,PSME2,PDGFB,IL22RA2,IL18BP,IKBKB,IKBKG,JAK1,DUSP5,RAPGEF1,PTAFR,STAT1,STAT3,PSMB8,PSMB9,F13A1,RORA,PIM1,MAP3K8,SOCS3,SOCS1,NFKB1,NFKB2,CXCL10,MYD88,RASGRF2,PIK3CD,KSR1,TNFRSF1B,IL2RG,CCL2,FYN,PTPN6,IL27RA,ICAM1,PIK3R1,CCR1,STAT5B,IL24,SYK,IL18,OSMR,IL32,IL33,KITLG,PDGFRB,PDGFRA,IL4R,RASGRP1,RASGRP4,RASGRP3,IRAK2,IL6,MMP2,IRAK3,MMP9,IL9R,PSMB10,PTK2B,CD4,JUNB,HIF1A,HMOX1,TIMP1,ZEB1,ALOX5,CSF…
Herpes simplex infection(K)	0.017	185	57	2.2204e-16	3.3085e-14	C3,HLA-DRB5,HLA-DRB4,EIF2AK2,EIF2AK4,HLA-DRB3,HLA-DRB1,IKBKB,IKBKG,IKBKE,JAK1,HLA-DPA1,RNASEL,HLA-DMA,HLA-DMB,STAT1,STAT2,HLA-DPB1,HLA-DOA,SOCS3,NFKB1,HLA-DRA,MYD88,CCL2,CD74,IL6,DDX58,IRF3,IRF7,IRF9,CFP,HLA-DQA1,IFIH1,IFNGR1,HLA-DQB1,IFNAR2,TAP2,TAP1,TRAF3,TRAF5,PML,IFIT1,HLA-B,HLA-C,HLA-A,HLA-F,HLA-E,TYK2,TLR3,SP100,ARNTL,FAS,NFKBIA,CASP8,OAS1,OAS2,OAS3
Cytokine-cytokine receptor interaction(K)	0.0244	265	67	7.8826e-15	1.009e-12	PDGFB,IL22RA2,PDGFC,CRLF2,CXCL13,CXCL14,CXCL16,LEPR,TNFRSF8,TNFRSF4,TNFRSF11B,TNFRSF10A,TNFRSF10D,CXCL10,CXCL11,CXCL12,FLT4,TNFSF13B,TNFRSF1B,IL2RG,CCL8,CCL2,TNFRSF6B,TNFSF10,TNFSF11,CCR1,TNFSF13,CD40,TNFRSF13B,IL24,IL18,OSMR,CD70,KITLG,PDGFRB,PDGFRA,IL4R,IL6,IL9R,TNFSF4,IFNGR1,CCL18,CCL16,CCL25,CCL23,CSF2,CSF1,IL13RA1,IFNAR2,CX3CR1,IL15RA,IL1R1,IL1R2,LIF,CX3CL1,CXCR3,CD40LG,FAS,CCL4L1,IL11RA,HGF…
Th17 cell differentiation(K)	0.0098	107	39	9.5812e-14	1.0731e-11	HLA-DRB5,HLA-DRB4,HLA-DRB3,HLA-DRB1,IKBKB,IKBKG,JAK1,HLA-DPA1,HLA-DMA,HLA-DMB,STAT1,STAT3,HLA-DPB1,RORA,HLA-DOA,NFKB1,HLA-DRA,IL2RG,IL27RA,STAT5B,PPP3CC,IL4R,IL6,CD4,PRKCQ,HIF1A,HLA-DQA1,NFATC2,IFNGR1,RARA,HLA-DQB1,AHR,LAT,IL1R1,RUNX1,TYK2,NFKBIA,NFKBIE,TGFBR2
Chemokine signaling pathway(K)	0.0172	187	52	2.7067e-13	2.6797e-11	PREX1,LYN,IKBKB,IKBKG,STAT1,STAT2,STAT3,CXCL13,CXCL14,CXCL16,RAP1A,NFKB1,CXCL10,CXCL11,CXCL12,PIK3CD,ARRB2,ROCK1,ROCK2,CCL8,CCL2,PIK3R1,CCR1,STAT5B,GNGT2,RAC2,GNAI2,PAK1,RASGRP2,GRK5,GRK6,PTK2B,ADCY4,ADCY3,ADCY7,CCL18,CCL16,CCL25,CCL23,SOS1,CX3CR1,CX3CL1,VAV3,VAV1,WAS,CXCR3,CCL4L1,ELMO1,NFKBIA,CXCL9,CXCL2,DOCK2
NOD-like receptor signaling pathway(K)	0.0156	170	49	3.7503e-13	3.3378e-11	TXNIP,RBCK1,IKBKB,IKBKG,IKBKE,JAK1,RIPK3,RNASEL,STAT1,STAT2,NFKB1,MYD88,CCL2,CTSB,IL18,CYBA,CARD16,IL6,TNFAIP3,IRF3,IRF7,IRF9,ATG12,MEFV,GSDMD,TMEM173,CARD9,IFNAR2,ITPR1,PSTPIP1,TRAF3,TRAF5,RNF31,NOD1,NLRC4,NOD2,TYK2,TLR4,NLRP1,NFKBIA,CXCL2,CASP8,CASP5,CASP1,OAS1,OAS2,OAS3,GBP2,GBP1
TNF signaling pathway(K)	0.0101	110	38	9.6789e-13	7.8399e-11	IKBKB,CASP10,IKBKG,RIPK3,MAP3K8,MAP3K5,SOCS3,NFKB1,CXCL10,PIK3CD,TNFRSF1B,CCL2,ICAM1,PIK3R1,IL6,TNFAIP3,MMP9,CREB3L1,JUNB,CSF2,CSF1,MAP2K3,BCL3,MAP3K14,TRADD,TRAF3,TRAF5,CEBPB,NOD2,CFLAR,LIF,CX3CL1,FAS,MLKL,NFKBIA,CXCL2,CASP7,CASP8
NF-kappa B signaling pathway(K)	0.0087	95	35	1.3207e-12	9.7733e-11	LYN,IKBKB,IKBKG,TICAM2,LY96,NFKB1,NFKB2,CXCL12,MYD88,TNFSF13B,ICAM1,TNFSF11,BTK,CD40,SYK,RELB,CARD11,TNFAIP3,DDX58,PRKCQ,PLCG2,MAP3K14,LAT,TRADD,TRAF3,TRAF5,CFLAR,IL1R1,GADD45B,TLR4,CD40LG,CCL4L1,NFKBIA,CXCL2,BLNK
Measles(K)	0.0125	136	42	2.1746e-12	1.4787e-10	EIF2AK2,EIF2AK4,IKBKE,JAK1,STAT1,STAT2,STAT3,TNFRSF10A,NFKB1,TNFRSF10D,MYD88,PIK3CD,IL2RG,FYN,TNFSF10,PIK3R1,STAT5B,CCND3,CCND2,IL6,TNFAIP3,ADAR,DDX58,IRF3,IRF7,IRF9,MX1,PRKCQ,CDKN1B,IFIH1,IFNGR1,TACR1,IFNAR2,CBLB,SH2D1A,TYK2,TLR4,FAS,NFKBIA,OAS1,OAS2,OAS3
Osteoclast differentiation(K)	0.0121	132	41	3.3389e-12	2.1369e-10	IKBKB,IKBKG,JAK1,STAT1,STAT2,NCF4,TNFRSF11B,SOCS3,SOCS1,NFKB1,NFKB2,PIK3CD,LCP2,FYN,FCGR2A,TNFSF11,BTK,PIK3R1,PPP3CC,SYK,RELB,CYBA,OSCAR,SIRPB1,IRF9,JUNB,PLCG2,NFATC2,FOSL2,CYLD,IFNGR1,CSF1,IFNAR2,MAP3K14,IL1R1,TYK2,CAMK4,SIRPG,NFKBIA,BLNK,TGFBR2
Viral myocarditis(K)	0.0054	59	27	4.2373e-12	2.5e-10	HLA-DRB5,HLA-DRB4,HLA-DRB3,HLA-DRB1,HLA-DPA1,HLA-DMA,HLA-DMB,BID,HLA-DPB1,HLA-DOA,HLA-DRA,FYN,ICAM1,CD40,RAC2,LAMA2,HLA-DQA1,HLA-DQB1,SGCA,HLA-B,HLA-C,HLA-A,HLA-F,HLA-E,CD40LG,CASP8,MYH6
Natural killer cell mediated cytotoxicity(K)	0.0124	135	41	6.6139e-12	3.7038e-10	HCST,BID,KIR2DL5A,TNFRSF10A,TNFRSF10D,PIK3CD,LCP2,SH3BP2,FYN,GZMB,PTPN6,ICAM2,ICAM1,TNFSF10,PIK3R1,PPP3CC,RAC2,SYK,PAK1,MICB,KIR2DL4,PTK2B,PLCG2,KIR2DS3,KIR2DS5,NFATC2,IFNGR1,CSF2,IFNAR2,LAT,SOS1,HLA-B,HLA-C,HLA-A,HLA-E,SH2D1A,VAV3,VAV1,FAS,KLRC2,KLRC3
Staphylococcus aureus infection(K)	0.0052	56	26	7.7115e-12	3.82e-10	C2,C3,HLA-DRB5,HLA-DRB4,HLA-DRB3,HLA-DRB1,HLA-DPA1,PTAFR,HLA-DMA,HLA-DMB,HLA-DPB1,HLA-DOA,HLA-DRA,C1S,C1R,FCGR2A,ICAM1,MASP1,CFB,CFD,CFH,CFI,HLA-DQA1,HLA-DQB1,C1QA,C5AR1
Tuberculosis(K)	0.0165	179	48	7.796e-12	3.82e-10	RFX5,C3,HLA-DRB5,HLA-DRB4,HLA-DRB3,HLA-DRB1,CASP10,JAK1,HLA-DPA1,HLA-DMA,HLA-DMB,BID,STAT1,HLA-DPB1,HLA-DOA,CORO1A,NFKB1,HLA-DRA,MYD88,CIITA,APAF1,KSR1,FCGR2A,CTSS,PPP3CC,SYK,IL18,CD74,IRAK2,VDR,IL6,HLA-DQA1,MRC2,IFNGR1,HLA-DQB1,CARD9,CLEC4E,CLEC7A,TRADD,LSP1,CR1,CEBPB,NOD2,TLR1,TLR4,TGFB3,CASP8,CAMK2G
Th1 and Th2 cell differentiation(K)	0.0085	92	33	1.1501e-11	5.4054e-10	RBPJ,HLA-DRB5,HLA-DRB4,HLA-DRB3,HLA-DRB1,IKBKB,IKBKG,JAK1,HLA-DPA1,HLA-DMA,HLA-DMB,STAT1,HLA-DPB1,HLA-DOA,MAF,NFKB1,HLA-DRA,IL2RG,STAT5B,PPP3CC,IL4R,CD4,MAML1,PRKCQ,HLA-DQA1,NFATC2,IFNGR1,HLA-DQB1,NOTCH1,LAT,TYK2,NFKBIA,NFKBIE
Intestinal immune network for IgA production(K)	0.0045	49	24	1.6696e-11	7.346e-10	HLA-DRB5,HLA-DRB4,HLA-DRB3,HLA-DRB1,HLA-DPA1,HLA-DMA,HLA-DMB,HLA-DPB1,HLA-DOA,CXCL12,HLA-DRA,TNFSF13B,TNFSF13,CD40,TNFRSF13B,IL6,ICOS,HLA-DQA1,HLA-DQB1,CCL25,MAP3K14,ICOSLG,IL15RA,CD40LG
HTLV-I infection(K)	0.0237	258	59	1.7814e-11	7.4819e-10	PDGFB,HLA-DRB5,HLA-DRB4,HLA-DRB3,HLA-DRB1,IKBKB,IKBKG,JAK1,HLA-DPA1,HLA-DMA,HLA-DMB,HLA-DPB1,HLA-DOA,NFKB1,NFKB2,HLA-DRA,PIK3CD,IL2RG,ICAM1,CDC26,PIK3R1,RRAS,STAT5B,XBP1,NRP1,CD40,PPP3CC,RELB,CCND3,CCND2,PDGFRB,PDGFRA,IL6,ELK4,MYB,HLA-DQA1,WNT10A,NFATC2,HLA-DQB1,ADCY4,ADCY3,ADCY7,CSF2,ZFP36,MAP3K14,IL15RA,IL1R1,IL1R2,HLA-B,HLA-C,HLA-A,HLA-F,HLA-E,TLN1,PTTG2,WNT5B,TGFB3,NFKBIA,TGFBR2
Allograft rejection(K)	0.0035	38	21	3.5278e-11	1.4111e-09	HLA-DRB5,HLA-DRB4,HLA-DRB3,HLA-DRB1,HLA-DPA1,HLA-DMA,HLA-DMB,HLA-DPB1,HLA-DOA,HLA-DRA,GZMB,CD40,HLA-DQA1,HLA-DQB1,HLA-B,HLA-C,HLA-A,HLA-F,HLA-E,CD40LG,FAS
Toxoplasmosis(K)	0.0109	118	36	1.1257e-10	4.2776e-09	HLA-DRB5,HLA-DRB4,HLA-DRB3,HLA-DRB1,IKBKB,IKBKG,JAK1,HLA-DPA1,HLA-DMA,HLA-DMB,STAT1,STAT3,HLA-DPB1,HLA-DOA,LY96,SOCS1,NFKB1,HLA-DRA,MYD88,CIITA,PIK3CD,PIK3R1,CD40,GNAI2,LAMA2,HLA-DQA1,IFNGR1,HLA-DQB1,ALOX5,MAP2K3,TYK2,TLR4,CD40LG,TGFB3,NFKBIA,CASP8
Graft-versus-host disease(K)	0.0038	41	21	1.3742e-10	5.0844e-09	HLA-DRB5,HLA-DRB4,HLA-DRB3,HLA-DRB1,HLA-DPA1,HLA-DMA,HLA-DMB,HLA-DPB1,HLA-DOA,KIR2DL5A,HLA-DRA,GZMB,IL6,HLA-DQA1,HLA-DQB1,HLA-B,HLA-C,HLA-A,HLA-F,HLA-E,FAS
Hematopoietic cell lineage(K)	0.0089	97	31	7.4615e-10	2.6115e-08	HLA-DRB5,HLA-DRB4,HLA-DRB3,HLA-DRB1,HLA-DPA1,HLA-DMA,HLA-DMB,HLA-DPB1,HLA-DOA,HLA-DRA,ITGA1,ITGA5,ANPEP,CD19,KITLG,IL4R,CD8B,IL6,MS4A1,IL9R,CD4,CD5,HLA-DQA1,HLA-DQB1,CSF2,CSF1,CR1,IL1R1,IL1R2,GP1BA,IL11RA
Inflammatory bowel disease (IBD)(K)	0.006	65	25	8.8931e-10	3.0236e-08	HLA-DRB5,HLA-DRB4,HLA-DRB3,HLA-DRB1,HLA-DPA1,HLA-DMA,HLA-DMB,STAT1,STAT3,HLA-DPB1,RORA,HLA-DOA,MAF,NFKB1,HLA-DRA,IL2RG,IL18,IL4R,IL6,HLA-DQA1,IFNGR1,HLA-DQB1,NOD2,TLR4,TGFB3
Primary immunodeficiency(K)	0.0034	37	19	9.8331e-10	3.2449e-08	RFX5,AIRE,IKBKG,CIITA,IL2RG,BTK,CD19,CD40,TNFRSF13B,CD8B,CD4,ICOS,ADA,IGLL1,TAP2,TAP1,CD79A,CD40LG,BLNK
B cell receptor signaling pathway(K)	0.0067	73	26	1.9834e-09	5.9503e-08	LYN,IKBKB,IKBKG,NFKB1,PIK3CD,PTPN6,PIK3AP1,BTK,PIK3R1,CD19,PPP3CC,RAC2,SYK,CARD11,RASGRP3,PLCG2,NFATC2,SOS1,IFITM1,CD79B,CD79A,VAV3,VAV1,NFKBIA,NFKBIE,BLNK
Leishmaniasis(K)	0.0067	73	26	1.9834e-09	5.9503e-08	C3,HLA-DRB5,HLA-DRB4,HLA-DRB3,HLA-DRB1,JAK1,HLA-DPA1,HLA-DMA,HLA-DMB,STAT1,HLA-DPB1,NCF4,HLA-DOA,NFKB1,HLA-DRA,MYD88,FCGR2A,PTPN6,CYBA,HLA-DQA1,IFNGR1,HLA-DQB1,CR1,TLR4,TGFB3,NFKBIA
Complement and coagulation cascades(K)	0.0073	79	27	2.309e-09	6.6961e-08	C2,C3,C7,F5,F13A1,C1S,C1R,MASP1,PROC,SERPINF2,SERPING1,CFB,CFD,CFH,CFI,SERPINA1,F10,CLU,F2R,CR1,VWF,VSIG4,C1QA,F2RL3,C5AR1,PLAUR,TFPI
Pathways in cancer(K)	0.0365	397	72	2.6417e-09	7.3968e-08	PDGFB,IKBKB,IKBKG,JAK1,BID,EGLN3,STAT1,STAT3,MAX,NFKB1,NFKB2,CXCL12,PIK3CD,ROCK1,ROCK2,RASSF1,RASSF5,EPAS1,LPAR1,LPAR4,PIK3R1,STAT5B,LPAR5,GNGT2,RAC2,ARHGEF1,GNAI2,KITLG,PDGFRB,PDGFRA,TCF7,RASGRP2,RASGRP1,RASGRP4,RASGRP3,IL6,MMP2,MMP9,LAMA2,VHL,HIF1A,PLCG2,WNT10A,CDKN1B,RARA,ADCY4,ADCY3,ADCY7,RUNX1T1,FGF1,F2R,TRAF3,TRAF5,SOS1,CEBPA,PML,CBLB,RUNX1,RALGDS,PTGER4,PTGER2,FAS,F2RL3,WNT5B,HGF,COL4A4,CO…
T cell activation(P)	0.0075	81	27	3.8724e-09	1.0843e-07	IKBKB,HLA-DPA1,HLA-DMA,HLA-DMB,HLA-DOA,NFKB1,NFKB2,HLA-DRA,PIK3CD,LCP2,PIK3R1,PPP3CC,RAC2,PAK1,CD74,PRKCQ,HLA-DQA1,NFATC2,ITPR1,LAT,SOS1,CSK,B2M,VAV3,VAV1,WAS,NFKBIA
RIG-I/MDA5 mediated induction of IFN-alpha/beta pathways(R)	0.0071	77	26	5.7897e-09	1.5632e-07	RNF216,IKBKB,CASP10,IKBKG,IKBKE,NFKB1,NFKB2,MYD88,UBE2L6,DHX58,UBA7,ISG15,TNFAIP3,DDX58,IRF3,IRF1,IRF2,IRF7,ATG12,CYLD,IFIH1,TRAF3,NLRC5,AGER,NFKBIA,CASP8
Jak-STAT signaling pathway(K)	0.0145	158	39	6.7164e-09	1.7463e-07	IL22RA2,JAK1,STAT1,STAT2,STAT3,CRLF2,PIM1,LEPR,CISH,PIAS1,SOCS3,SOCS1,PIK3CD,IL2RG,PTPN6,IL27RA,PIK3R1,STAT5B,IL24,OSMR,CCND3,CCND2,IL4R,IL6,IL9R,IRF9,IFNGR1,CSF2,IL13RA1,IFNAR2,MCL1,SOS1,IL15RA,LIF,TYK2,IL11RA,LIFR,CSF2RB,AOX1
TCR signaling in na&#xef;ve CD4+ T cells(N)	0.0062	67	24	7.3663e-09	1.8416e-07	HLA-DRB1,IKBKB,IKBKG,MAP3K8,RAP1A,HLA-DRA,LCP2,FYB,SH3BP2,FYN,PTPN6,RASSF5,DBNL,CARD11,RASGRP2,RASGRP1,CD4,PRKCQ,MAP3K14,LAT,SOS1,CSK,VAV1,WAS
Type I diabetes mellitus(K)	0.004	43	19	1.0683e-08	2.5639e-07	HLA-DRB5,HLA-DRB4,HLA-DRB3,HLA-DRB1,HLA-DPA1,HLA-DMA,HLA-DMB,HLA-DPB1,HLA-DOA,HLA-DRA,GZMB,HLA-DQA1,HLA-DQB1,HLA-B,HLA-C,HLA-A,HLA-F,HLA-E,FAS
Costimulation by the CD28 family(R)	0.0058	63	23	1.0689e-08	2.5654e-07	LYN,HLA-DRB5,HLA-DRB4,HLA-DRB3,HLA-DRB1,HLA-DPA1,HLA-DPB1,MAP3K8,HLA-DRA,FYN,PTPN6,PIK3R1,PAK1,CD4,ICOS,HLA-DQA1,HLA-DQB2,HLA-DQB1,MAP3K14,CSK,ICOSLG,PDCD1LG2,VAV1
Autoimmune thyroid disease(K)	0.0049	53	21	1.1745e-08	2.7014e-07	HLA-DRB5,HLA-DRB4,HLA-DRB3,HLA-DRB1,HLA-DPA1,HLA-DMA,HLA-DMB,HLA-DPB1,HLA-DOA,HLA-DRA,GZMB,CD40,HLA-DQA1,HLA-DQB1,HLA-B,HLA-C,HLA-A,HLA-F,HLA-E,CD40LG,FAS
Neutrophil degranulation(R)	0.0362	393	69	1.9962e-08	4.3917e-07	GMFG,IQGAP2,C3,ATG7,LYZ,ARHGAP9,MMP25,VAMP8,PTAFR,TICAM2,FTL,RAP1A,NFKB1,SNAP25,APAF1,TNFRSF1B,ROCK1,CECR1,FCGR2A,PTPN6,ANPEP,BST2,CTSZ,CTSS,CTSH,CTSC,CTSB,DBNL,RAP2C,CD47,CREG1,GCA,CD93,CYBA,OSCAR,SIRPB1,MMP9,CHI3L1,UNC13D,CFD,CFP,PLAC8,NCKAP1L,ELANE,GSDMD,SERPINA1,TMEM173,ALOX5,RAB31,CR1,RAB14,FTH1,TBC1D10C,B2M,HLA-B,HLA-C,HLA-A,HBB,RHOG,RHOF,CST3,HMHA1,C5AR1,DIAPH1,MAN2B1,B4GALT1,PLAUR,DOCK2,L…
IL12-mediated signaling events(N)	0.0056	61	22	2.7345e-08	6.0159e-07	HLA-DRB1,STAT1,STAT3,SOCS1,NFKB1,NFKB2,HLA-DRA,IL2RG,GZMA,GZMB,IL18,RELB,CD8B,CD4,MAP2K3,B2M,IL1R1,HLA-A,GADD45B,GADD45G,TYK2,HLX
Apoptosis(K)	0.0129	140	35	2.9256e-08	6.1438e-07	IKBKB,CASP10,IKBKG,BID,MAP3K5,TUBA4A,BCL2L11,TNFRSF10A,NFKB1,TNFRSF10D,PIK3CD,APAF1,GZMB,TNFSF10,PIK3R1,CTSZ,CTSW,CTSS,CTSO,CTSH,CTSC,CTSB,ERN1,ITPR1,MCL1,MAP3K14,TRADD,CFLAR,GADD45B,GADD45G,FAS,CSF2RB,NFKBIA,CASP7,CASP8
Epstein-Barr virus infection(K)	0.0188	204	44	3.569e-08	7.4949e-07	RBPJ,LYN,HLA-DRB5,HLA-DRB4,EIF2AK2,EIF2AK4,HLA-DRB3,HLA-DRB1,IKBKB,IKBKG,JAK1,HLA-DPA1,STAT3,HLA-DPB1,NFKB1,NFKB2,HLA-DRA,PIK3CD,ICAM1,PIK3R1,CD19,CD40,SYK,RELB,TNFAIP3,DDX58,IRF3,PLCG2,HLA-DQA1,CDKN1B,HLA-DQB1,MAP2K3,MAP3K14,TRADD,TRAF3,TRAF5,HLA-B,HLA-C,HLA-A,HLA-F,HLA-E,TYK2,NFKBIA,NFKBIE
TCR signaling in na&#xef;ve CD8+ T cells(N)	0.005	54	20	7.6039e-08	1.5208e-06	IKBKB,IKBKG,MAP3K8,RAP1A,LCP2,FYN,PTPN6,RASSF5,CD8B,CARD11,RASGRP2,RASGRP1,PRKCQ,MAP3K14,LAT,SOS1,CSK,B2M,HLA-A,VAV1
Toll-Like Receptors Cascades(R)	0.013	141	34	1.0563e-07	2.1125e-06	MEF2A,IKBKB,IKBKG,IKBKE,RIPK3,MAP3K8,TICAM2,LY96,SOCS1,LY86,NFKB1,NFKB2,MYD88,PTPN4,BTK,CTSS,CTSB,IRAK2,IRAK3,IRF3,IRF7,PLCG2,MAP2K3,TRAF3,UNC93B1,NOD1,NOD2,RPS6KA1,TLR1,TLR4,TLR3,AGER,NFKBIA,CASP8
Asthma(K)	0.0029	31	15	1.1809e-07	2.2436e-06	HLA-DRB5,HLA-DRB4,HLA-DRB3,HLA-DRB1,HLA-DPA1,HLA-DMA,HLA-DMB,HLA-DPB1,HLA-DOA,HLA-DRA,CD40,FCER1A,HLA-DQA1,HLA-DQB1,CD40LG
Platelet activation(K)	0.0112	122	31	1.262e-07	2.3978e-06	LYN,VAMP8,P2RY12,COL3A1,RAP1A,PIK3CD,LCP2,ROCK1,ROCK2,FYN,FCGR2A,BTK,PIK3R1,SYK,ARHGEF1,GNAI2,RASGRP2,RASGRP1,PLA2G4C,PLCG2,APBB1IP,ADCY4,ADCY3,ADCY7,F2R,ITPR1,VWF,TLN1,MYL12A,GP1BA,F2RL3
Focal adhesion(K)	0.0185	201	42	1.6775e-07	3.1872e-06	MYL9,PDGFB,PDGFC,RAPGEF1,FLNC,RAP1A,FLT4,PIK3CD,ITGA1,ITGA8,ITGA5,ROCK1,ROCK2,FYN,PIK3R1,COL9A2,RAC2,PAK1,RELN,CCND3,CCND2,PDGFRB,PDGFRA,LAMA2,ZYX,TNC,VWF,SOS1,TLN1,MYL12A,VAV3,VAV1,TNXB,HGF,COL4A4,COL4A3,DIAPH1,COL6A2,COL6A1,COL6A3,COL6A6,THBS2
T cell receptor signaling pathway(K)	0.0097	105	28	1.9725e-07	3.5505e-06	IKBKB,IKBKG,MAP3K8,NFKB1,PIK3CD,LCP2,FYN,PTPN6,PIK3R1,PPP3CC,PAK1,CD8B,CARD11,RASGRP1,CD4,PRKCQ,ICOS,NFATC2,CSF2,MAP3K14,LAT,SOS1,CBLB,VAV3,VAV1,CD40LG,NFKBIA,NFKBIE
IL6-mediated signaling events(N)	0.0043	47	18	2.0792e-07	3.7425e-06	JAK1,STAT1,STAT3,PIAS1,SOCS3,TNFSF11,PIK3R1,IL6,IRF1,JUNB,TIMP1,MCL1,SOS1,CEBPB,CEBPD,TYK2,VAV1,LMO4
Toll-like receptor signaling pathway(K)	0.0098	106	28	2.3769e-07	4.0407e-06	IKBKB,IKBKG,IKBKE,STAT1,MAP3K8,TICAM2,LY96,NFKB1,CXCL10,CXCL11,MYD88,PIK3CD,PIK3R1,CD40,IL6,IRF3,IRF7,IRF5,IFNAR2,MAP2K3,TRAF3,TLR1,TLR4,TLR3,CCL4L1,NFKBIA,CXCL9,CASP8
Gastrin-CREB signalling pathway via PKC and MAPK(R)	0.0346	376	63	4.0942e-07	6.9601e-06	PSME1,PSME2,PDGFB,HCRT,JAK1,DUSP5,PTAFR,P2RY11,PSMB8,PSMB9,GPR68,GPR65,UTS2,RASGRF2,KSR1,IL2RG,FYN,LPAR1,LPAR4,PIK3R1,LPAR5,GCGR,KITLG,RGS2,PDGFRB,PDGFRA,RASGRP2,RASGRP1,RASGRP4,RASGRP3,GRK5,PSMB10,PRKCH,PRKCQ,GPR132,TACR1,MGLL,CCL23,DGKE,CSF2,DGKA,FGF1,CYSLTR1,F2R,DGKZ,ITPR1,RASAL3,LAT,SOS1,P2RY6,RPS6KA1,PTGFR,GFRA1,GFRA2,GHRL,F2RL3,PMCH,HGF,CSF2RB,RASA4,RGS19,GNA14,CAMK2G
MAPK signaling pathway(K)	0.0235	255	48	4.4858e-07	7.6259e-06	CACNA2D3,PDGFB,IKBKB,IKBKG,DUSP5,DUSP1,FLNC,MAP3K8,MAP3K5,MAX,RAP1A,NFKB1,NFKB2,RASGRF2,ARRB2,PPM1B,NTRK2,RRAS,PPP3CC,RAC2,RELB,PAK1,PDGFRB,PDGFRA,CACNA1C,RASGRP2,CACNA1E,RASGRP1,RASGRP4,RASGRP3,CACNA1I,PLA2G4C,ELK4,FGF1,MAP2K3,CACNB1,MAP3K14,SOS1,RPS6KA1,IL1R1,IL1R2,GADD45B,GADD45G,MAP4K2,FAS,STK4,TGFB3,TGFBR2
Cell adhesion molecules (CAMs)(K)	0.0133	145	33	5.733e-07	9.1728e-06	HLA-DRB5,HLA-DRB4,HLA-DRB3,HLA-DRB1,HLA-DPA1,HLA-DMA,HLA-DMB,JAM2,HLA-DPB1,HLA-DOA,HLA-DRA,ITGA8,ICAM2,ICAM3,ICAM1,CD40,CD8B,VCAN,CD4,ICOS,HLA-DQA1,HLA-DQB1,CDH5,NLGN2,NLGN4X,ICOSLG,HLA-B,HLA-C,HLA-A,HLA-F,HLA-E,PDCD1LG2,CD40LG
DAP12 interactions(R)	0.0297	323	56	6.53e-07	1.0448e-05	PSME1,PSME2,PDGFB,PIP5K1B,MOV10,JAK1,DUSP5,PSMB8,PSMB9,RASGRF2,PIK3CD,KSR1,LCP2,IL2RG,FYN,PIK3AP1,BTK,PIK3R1,CD19,SYK,KITLG,PDGFRB,PDGFRA,RASGRP1,RASGRP4,RASGRP3,SIRPB1,PSMB10,PLCG2,ICOS,KIR2DS5,CDKN1B,ADCY4,ADCY3,ADCY7,CSF2,FGF1,ITPR1,RASAL3,LAT,SOS1,B2M,HLA-B,HLA-C,HLA-E,SIGLEC16,VAV3,GFRA1,GFRA2,VAV1,CAMK4,HGF,CSF2RB,KLRC2,RASA4,CAMK2G
Hepatitis C(K)	0.0122	133	31	7.6869e-07	1.2299e-05	EIF2AK2,EIF2AK4,IKBKB,IKBKG,IKBKE,JAK1,RNASEL,STAT1,STAT2,STAT3,PIAS1,SOCS3,NFKB1,PIK3CD,PIK3R1,DDX58,IRF3,IRF1,IRF7,IRF9,IFNAR2,TRADD,TRAF3,SOS1,IFIT1,TYK2,TLR3,NFKBIA,OAS1,OAS2,OAS3
Extracellular matrix organization(R)	0.0235	255	47	1.0425e-06	1.668e-05	PDGFB,BGN,MMP19,JAM2,COL3A1,EFEMP1,ITGA1,ITGAD,ITGA8,ITGA5,COL15A1,NTN4,ICAM2,ICAM3,ICAM1,COL9A2,CTSS,CTSB,CD47,LOXL1,PCOLCE,FBN1,MMP2,MMP9,VCAN,LAMA2,ELANE,TIMP1,FMOD,TNC,ADAMTS2,MFAP5,MFAP4,COL8A2,COL18A1,COL4A4,COL4A3,FBLN1,FBLN2,NID2,FBLN5,TGFB3,DCN,COL6A2,COL6A1,COL6A3,LUM
B cell activation(P)	0.0054	59	19	1.2472e-06	1.8612e-05	LYN,IKBKB,NFKB2,PIK3CD,BTK,CD19,GRAP,RAC2,SYK,PLCG2,NFATC2,ITPR1,SOS1,CD79B,CD79A,VAV3,VAV1,NFKBIA,BLNK
Semaphorin interactions(R)	0.006	65	20	1.3112e-06	1.8612e-05	DPYSL3,MYL9,ITGA1,ROCK1,ROCK2,FYN,RRAS,NRP1,RAC2,PAK1,PLXNA4,PLXNA3,SEMA3A,SEMA4D,TLN1,RHOG,MYH11,FES,MYH9,LIMK1
BCR signaling pathway(N)	0.006	65	20	1.3112e-06	1.8612e-05	LYN,IKBKB,IKBKG,NFKB1,SH3BP5,PTPN6,BTK,PIK3R1,CD19,PPP3CC,SYK,CARD11,PLCG2,SOS1,CSK,CD79B,CD79A,NFKBIA,BLNK,CAMK2G
Inflammation mediated by chemokine and cytokine signaling pathway(P)	0.0065	71	21	1.3295e-06	1.8612e-05	PREX1,IKBKB,STAT3,CISH,SOCS3,NFKB2,PIK3CD,ROCK1,GRAP,RAC2,GRK6,PTK2B,PLCG2,VWF,SOS1,PLCL2,VAV1,NFKBIA,COL6A1,RGS13,ALOX5AP
TCR signaling(R)	0.0113	123	29	1.3862e-06	1.9406e-05	PSME1,PSME2,HLA-DRB5,HLA-DRB4,HLA-DRB3,HLA-DRB1,IKBKB,IKBKG,HLA-DPA1,PSMB8,PSMB9,HLA-DPB1,NFKB1,HLA-DRA,LCP2,FYB,PIK3R1,PAK1,CARD11,PSMB10,CD4,PRKCQ,HLA-DQA1,HLA-DQB2,HLA-DQB1,LAT,CSK,WAS,NFKBIA
Rheumatoid arthritis(K)	0.0083	90	24	1.4368e-06	2.0115e-05	HLA-DRB5,HLA-DRB4,HLA-DRB3,HLA-DRB1,HLA-DPA1,HLA-DMA,HLA-DMB,HLA-DPB1,HLA-DOA,CXCL12,HLA-DRA,TNFSF13B,CCL2,ICAM1,TNFSF11,TNFSF13,IL18,IL6,HLA-DQA1,HLA-DQB1,CSF2,CSF1,TLR4,TGFB3
Nucleotide-binding domain, leucine rich repeat containing receptor (NLR) signaling pathways(R)	0.0035	38	15	1.4568e-06	2.0395e-05	TXNIP,IKBKB,IKBKG,IRAK2,TNFAIP3,MEFV,CYLD,CARD9,PSTPIP1,NOD1,NLRC4,NOD2,NLRP1,CASP8,CASP1
GPVI-mediated activation cascade(R)	0.0045	49	17	1.6825e-06	2.3555e-05	LYN,JAK1,PIK3CD,LCP2,IL2RG,FYN,PTPN6,PIK3R1,RAC2,SYK,PLCG2,CSF2,LAT,VAV3,RHOG,VAV1,CSF2RB
Beta2 integrin cell surface interactions(N)	0.0027	29	13	1.856e-06	2.4128e-05	THY1,C3,ITGAD,FCGR2A,ICAM2,ICAM3,ICAM1,PROC,F10,GP1BA,CD40LG,TGFBI,PLAUR
Phagosome(K)	0.0142	154	33	2.053e-06	2.6689e-05	C3,HLA-DRB5,HLA-DRB4,HLA-DRB3,HLA-DRB1,HLA-DPA1,HLA-DMA,HLA-DMB,HLA-DPB1,NCF4,HLA-DOA,TUBA4A,CORO1A,HLA-DRA,ITGA5,C1R,FCGR2A,MSR1,CTSS,CYBA,HLA-DQA1,MRC2,HLA-DQB1,TAP2,TAP1,CLEC7A,HLA-B,HLA-C,HLA-A,HLA-F,HLA-E,TLR4,THBS2
Signaling by PDGF(R)	0.0302	328	55	2.1943e-06	2.8526e-05	PSME1,PSME2,PDGFB,PDGFC,PIP5K1B,MOV10,JAK1,DUSP5,RAPGEF1,STAT1,STAT3,PSMB8,PSMB9,RASGRF2,PIK3CD,KSR1,IL2RG,FYN,PIK3AP1,PIK3R1,CD19,STAT5B,COL9A2,KITLG,PDGFRB,PDGFRA,RASGRP1,RASGRP4,RASGRP3,PSMB10,ICOS,CDKN1B,ADCY4,ADCY3,ADCY7,CSF2,FGF1,ITPR1,RASAL3,LAT,SOS1,GFRA1,GFRA2,VAV1,CAMK4,HGF,COL4A4,COL4A3,CSF2RB,RASA4,COL6A2,COL6A1,COL6A3,THBS2,CAMK2G
CXCR4-mediated signaling events(N)	0.0074	80	22	2.3998e-06	3.0392e-05	LYN,HLA-DRB1,STAT1,STAT2,STAT3,BLK,CXCL12,HLA-DRA,ARRB2,FYN,PTPN6,STAT5B,GNAI2,PAK1,GRK6,MMP9,PTK2B,CD4,CSK,VAV1,DNM1,LIMK1
Fc-epsilon receptor I signaling in mast cells(N)	0.0057	62	19	2.5326e-06	3.0392e-05	LYN,IKBKB,IKBKG,DUSP1,NFKB1,LCP2,FYN,BTK,PIK3R1,FCER1A,SYK,WIPF1,NFATC2,HCLS1,LAT,SOS1,CBLB,VAV1,S1PR1
Ligand-dependent caspase activation(R)	0.0016	17	10	2.7604e-06	3.3125e-05	TICAM2,LY96,TNFRSF10A,TNFSF10,TRADD,CFLAR,TLR4,TLR3,FAS,CASP8
Transcriptional misregulation in cancer(K)	0.0166	180	36	3.3162e-06	3.9795e-05	PBX3,PBX1,FLI1,MAF,MAX,GRIA3,NFKB1,HHEX,PTCRA,GZMB,ID2,CD40,CCND2,IL6,LYL1,MMP9,ETV6,ETV7,ELK4,ELANE,REL,CDKN1B,ZEB1,RARA,RUNX1T1,CSF2,ERG,CDK9,BCL6,CEBPA,CEBPB,PML,IL1R2,RUNX1,NFKBIZ,TGFBR2
Phospholipase D signaling pathway(K)	0.0133	144	31	3.7873e-06	4.5448e-05	PDGFB,PDGFC,PIP5K1B,PIK3CD,FYN,LPAR1,LPAR4,PIK3R1,RRAS,LPAR5,FCER1A,SYK,KITLG,PDGFRB,PDGFRA,GRM2,PLA2G4C,PTK2B,CYTH1,PLCG2,ADCY4,ADCY3,ADCY7,DGKE,DGKA,F2R,DGKZ,SOS1,PTGFR,RALGDS,DNM1
Class I MHC mediated antigen processing & presentation(R)	0.0174	189	37	3.9129e-06	4.6955e-05	PSME1,PSME2,RBCK1,RNF213,LNPEP,IKBKB,IKBKG,VAMP8,PSMB8,PSMB9,NCF4,FBXW7,LY96,MYD88,TRIM69,ZNRF2,ERAP2,ERAP1,FBXO6,TRIM21,HERC6,BTK,CTSS,CYBA,TAPBP,PSMB10,TAP2,TAP1,DTX3L,B2M,HLA-B,HLA-C,HLA-A,HLA-F,HLA-E,TLR1,TLR4
Signalling by NGF(R)	0.0387	421	65	3.9541e-06	4.7449e-05	PREX1,MEF2A,PSME1,PSME2,PDGFB,PIP5K1B,MOV10,IKBKB,JAK1,DUSP5,RAPGEF1,STAT3,PSMB8,PSMB9,BCL2L11,RAP1A,NFKB1,MYD88,RASGRF2,PIK3CD,KSR1,ADORA2A,IL2RG,FYN,NTRK2,PIK3AP1,PIK3R1,CD19,NET1,AKAP13,ARHGEF3,ARHGEF1,ARHGEF6,KITLG,PDGFRB,PDGFRA,RASGRP1,RASGRP4,RASGRP3,PSMB10,ICOS,CDKN1B,ADCY4,ADCY3,ADCY7,FGD2,FGD3,CSF2,FGF1,ITPR1,RASAL3,LAT,SOS1,RPS6KA1,RALGDS,VAV3,GFRA1,GFRA2,VAV1,CAMK4,HGF,CSF2RB,NFKBIA,RA…
Hepatitis B(K)	0.0134	146	31	4.96e-06	5.4559e-05	IKBKB,CASP10,IKBKG,IKBKE,JAK1,STAT1,STAT2,STAT3,TICAM2,NFKB1,MYD88,PIK3CD,APAF1,PIK3R1,STAT5B,IL6,DDX58,MMP9,IRF3,IRF7,PTK2B,CREB3L1,NFATC2,CDKN1B,IFIH1,TLR4,TLR3,FAS,TGFB3,NFKBIA,CASP8
Signaling by SCF-KIT(R)	0.0267	290	49	6.4254e-06	7.0679e-05	PSME1,PSME2,PDGFB,PIP5K1B,LYN,MOV10,JAK1,DUSP5,STAT1,STAT3,PSMB8,PSMB9,SOCS1,RASGRF2,PIK3CD,KSR1,IL2RG,FYN,SH2B3,SH2B2,PTPN6,PIK3AP1,PIK3R1,CD19,STAT5B,GRAP,KITLG,PDGFRB,PDGFRA,RASGRP1,RASGRP4,RASGRP3,MMP9,PSMB10,ICOS,CDKN1B,CSF2,FGF1,RASAL3,LAT,SOS1,GFRA1,GFRA2,VAV1,HGF,CSF2RB,FES,RASA4,CAMK2G
EPO signaling pathway(N)	0.003	33	13	7.3288e-06	8.0617e-05	LYN,RAPGEF1,STAT1,SOCS3,RAP1A,NFKB1,SH2B3,PTPN6,BTK,PIK3R1,STAT5B,PLCG2,SOS1
PI3K-Akt signaling pathway(K)	0.0314	341	54	1.3244e-05	0.00014349	PDGFB,PDGFC,IKBKB,IKBKG,JAK1,BCL2L11,NFKB1,FLT4,PIK3CD,ITGA1,ITGA8,ITGA5,IL2RG,PIK3AP1,LPAR1,LPAR4,PIK3R1,CD19,LPAR5,COL9A2,GNGT2,SYK,OSMR,RELN,KITLG,CCND3,CCND2,PDGFRB,PDGFRA,IL4R,IL6,LAMA2,CREB3L1,MYB,CDKN1B,CSF1,TNC,FGF1,IFNAR2,F2R,MCL1,VWF,SOS1,TLR4,TNXB,HGF,COL4A4,COL4A3,RBL2,COL6A2,COL6A1,COL6A3,COL6A6,THBS2
C-type lectin receptors (CLRs)(R)	0.0128	139	29	1.3623e-05	0.00014349	PSME1,PSME2,LYN,IKBKB,IKBKG,PSMB8,PSMB9,NFKB1,NFKB2,FYN,ICAM2,ICAM3,SYK,RELB,PAK1,CARD11,MUC16,PSMB10,PLCG2,NFATC2,CARD9,CLEC4E,ITPR1,CLEC7A,CLEC6A,MAP3K14,NFKBIA,CASP8,MUC1
Fc epsilon RI signaling pathway(K)	0.0064	70	19	1.3626e-05	0.00014349	LYN,PIK3CD,LCP2,FYN,BTK,PIK3R1,RAC2,FCER1A,SYK,PLA2G4C,PLCG2,ALOX5,CSF2,MAP2K3,LAT,SOS1,VAV3,VAV1,ALOX5AP
RIG-I-like receptor signaling pathway(K)	0.0064	70	19	1.3626e-05	0.00014349	IKBKB,CASP10,IKBKG,IKBKE,NFKB1,CXCL10,DHX58,ISG15,DDX58,IRF3,IRF7,ATG12,CYLD,IFIH1,TMEM173,TRADD,TRAF3,NFKBIA,CASP8
Cytosolic DNA-sensing pathway(K)	0.0059	64	18	1.4349e-05	0.00014349	IKBKB,IKBKG,IKBKE,RIPK3,NFKB1,CXCL10,IL18,IL33,ZBP1,IL6,ADAR,DDX58,IRF3,IRF7,TMEM173,CCL4L1,NFKBIA,CASP1
amb2 Integrin signaling(N)	0.0029	31	12	1.9289e-05	0.00019289	THY1,JAM2,RAP1A,NFKB1,ROCK1,LRP1,ICAM1,IL6,MMP2,MMP9,TLN1,AGER
Rap1 signaling pathway(K)	0.0195	212	38	2.0127e-05	0.00020127	PDGFB,PDGFC,RAPGEF1,RAP1A,FLT4,PIK3CD,ADORA2A,LCP2,FYB,RASSF5,LPAR1,LPAR4,PIK3R1,RRAS,LPAR5,RAC2,GNAI2,KITLG,PDGFRB,PDGFRA,RASGRP2,RASGRP3,APBB1IP,ADCY4,ADCY3,ADCY7,CSF1,FGF1,MAP2K3,F2R,LAT,TLN1,PFN1,RALGDS,SIPA1,F2RL3,HGF,RGS14
Signaling by VEGF(R)	0.0264	287	47	2.1339e-05	0.00021339	PSME1,PSME2,PDGFB,JAK1,DUSP5,PSMB8,PSMB9,NCF4,FLT4,RASGRF2,KSR1,ROCK1,ROCK2,IL2RG,FYN,PIK3R1,NRP1,PAK1,KITLG,PDGFRB,PDGFRA,CYBA,RASGRP1,RASGRP4,RASGRP3,PSMB10,PTK2B,CYFIP2,NCKAP1L,CSF2,FGF1,CDH5,ITPR1,RASAL3,LAT,SOS1,SH2D2A,VAV3,GFRA1,GFRA2,VAV1,AXL,HGF,ELMO1,CSF2RB,RASA4,CAMK2G
Beta1 integrin cell surface interactions(N)	0.0061	66	18	2.1378e-05	0.00021378	JAM2,COL3A1,F13A1,ITGA1,ITGA8,ITGA5,FBN1,LAMA2,TNC,COL18A1,COL4A4,COL4A3,TGFBI,PLAUR,COL6A2,COL6A1,COL6A3,THBS2
Integrin signalling pathway(P)	0.0145	158	31	2.2276e-05	0.00022276	RAPGEF1,COL3A1,MAP3K5,RAP1A,PIK3CD,ITGA1,ITGAD,ITGA8,ITGA5,COL15A1,FYN,PIK3R1,RRAS,GRAP,COL9A2,RAC2,RAP2C,PTK2B,MAP2K3,PIK3C2B,SOS1,CSK,COL8A2,TLN1,COL4A4,COL4A3,ELMO1,ARHGAP26,COL6A2,COL6A1,COL6A3
IL23-mediated signaling events(N)	0.0034	37	13	2.3887e-05	0.00023887	STAT1,STAT3,SOCS3,NFKB1,CCL2,PIK3R1,IL24,IL18,IL6,CD4,TYK2,NFKBIA,CXCL9
GMCSF-mediated signaling events(N)	0.0034	37	13	2.3887e-05	0.00023887	LYN,IKBKB,STAT1,STAT3,PIM1,CISH,CCL2,PIK3R1,STAT5B,SYK,CSF2,SOS1,CSF2RB
Legionellosis(K)	0.0051	55	16	2.8371e-05	0.00025533	C3,NFKB1,NFKB2,MYD88,APAF1,IL18,CLK1,IL6,CR1,NLRC4,TLR4,NFKBIA,CXCL2,CASP7,CASP8,CASP1
Leukocyte transendothelial migration(K)	0.0107	116	25	3.1252e-05	0.00028127	MYL9,THY1,JAM2,NCF4,RAP1A,CXCL12,PIK3CD,ROCK1,ROCK2,ICAM1,RASSF5,PIK3R1,RAC2,GNAI2,CYBA,MMP2,MMP9,PTK2B,PLCG2,CDH5,MYL12A,VAV3,RHOH,VAV1,SIPA1
Atypical NF-kappaB pathway(N)	0.0013	14	8	3.3188e-05	0.00029869	IKBKB,NFKB1,ARRB2,PIK3R1,SYK,REL,BCL3,NFKBIA
Direct p53 effectors(N)	0.0121	132	27	3.709e-05	0.00033381	CASP10,DUSP5,DUSP1,BID,TNFRSF10A,TNFRSF10D,APAF1,CD82,PRDM1,VDR,MMP2,VCAN,IRF5,BTG2,TAP1,HIC1,MCL1,BCL6,NLRC4,PML,SH2D1A,LIF,COL18A1,CX3CL1,FAS,HGF,CASP1
IL4-mediated signaling events(N)	0.0058	63	17	4.0754e-05	0.00036679	THY1,JAK1,SOCS3,SOCS1,IL2RG,PTPN6,PIK3R1,STAT5B,IL4R,DOK2,MYB,IL13RA1,BCL6,CEBPB,PARP14,CD40LG,FES
Pertussis(K)	0.007	76	19	4.0773e-05	0.00036696	C2,C3,TICAM2,LY96,NFKB1,MYD88,ITGA5,C1S,C1R,GNAI2,IL6,IRF3,IRF1,SERPING1,NOD1,TLR4,C1QA,CASP7,CASP1
Acute myeloid leukemia(K)	0.0052	57	16	4.3058e-05	0.00038752	IKBKB,IKBKG,STAT3,PIM1,PIM2,NFKB1,PIK3CD,PIK3R1,STAT5B,TCF7,RARA,RUNX1T1,SOS1,CEBPA,PML,RUNX1
AP-1 transcription factor network(N)	0.0064	70	18	4.5207e-05	0.00040686	GATA2,DUSP1,FABP4,MAF,BCL2L11,CCL2,NR3C1,IL6,MMP9,MYB,JUNB,HIF1A,NFATC2,FOSL2,CDKN1B,TIMP1,CSF2,HLA-A
IFN-gamma pathway(N)	0.0037	40	13	5.2346e-05	0.0004378	JAK1,RAPGEF1,STAT1,PIAS1,RAP1A,SOCS1,PIK3R1,IRF1,IRF9,IFNGR1,CEBPB,CASP1,CAMK2G
Regulated Necrosis(R)	0.0014	15	8	5.3546e-05	0.0004378	RIPK3,TNFRSF10A,TNFSF10,TRADD,CFLAR,FAS,MLKL,CASP8
Signaling events mediated by PTP1B(N)	0.0048	52	15	5.4725e-05	0.0004378	PDGFB,LYN,STAT3,LEPR,BLK,SOCS3,FYN,FCGR2A,PIK3R1,STAT5B,PDGFRB,CSF1,LAT,CSK,TYK2
Signaling events mediated by TCPTP(N)	0.0032	35	12	6.1071e-05	0.00048857	PDGFB,EIF2AK2,JAK1,STAT1,STAT3,PIAS1,ITGA1,STAT5B,PDGFRB,CSF1,SOS1,HGF
Endogenous TLR signaling(N)	0.0023	25	10	7.1598e-05	0.00057278	IKBKB,IKBKG,BGN,LY96,MYD88,IRAK2,VCAN,TLR1,TLR4,TLR3
TNFR2 non-canonical NF-kB pathway(R)	0.0093	101	22	7.8384e-05	0.00062707	PSME1,PSME2,PSMB8,PSMB9,TNFRSF8,TNFRSF4,TNFRSF11B,NFKB2,TNFSF13B,TNFRSF1B,TNFRSF6B,TNFSF11,TNFSF13,CD40,TNFRSF13B,RELB,CD70,PSMB10,TNFSF4,MAP3K14,TRAF3,CD40LG
Signaling by Rho GTPases(R)	0.0304	330	50	8.0838e-05	0.0006467	PREX1,STARD8,MYL9,IQGAP2,ARHGAP9,ARHGAP4,GMIP,NCF4,RASGRF2,ROCK1,ROCK2,PPP1R14A,NET1,AKAP13,RAC2,ARHGEF3,ARHGEF1,ARHGEF6,PAK1,CYBA,MKL1,CYFIP2,WIPF1,NCKAP1L,CDKN1B,FGD2,FGD3,CHN1,EVL,SOS1,VAV3,RHOG,RHOH,RHOF,VAV1,RHOU,WAS,ARHGDIB,HMHA1,ARHGAP18,ARHGAP17,ARHGAP22,MYH11,ARHGAP26,DIAPH1,ARHGAP30,ARAP2,ARAP1,MYH9,LIMK1
IL2-mediated signaling events(N)	0.005	54	15	8.2666e-05	0.00066133	JAK1,STAT1,STAT3,CISH,SOCS3,SOCS1,IL2RG,FYN,IKZF3,PIK3R1,STAT5B,SYK,DOK2,PTK2B,SOS1
Signaling by the B Cell Receptor (BCR)(R)	0.0248	270	43	8.7166e-05	0.00069733	PSME1,PSME2,PDGFB,PIP5K1B,LYN,MOV10,IKBKB,IKBKG,PSMB8,PSMB9,BLK,NFKB1,PIK3CD,FYN,PTPN6,PIK3AP1,BTK,PIK3R1,CD19,SYK,KITLG,PDGFRB,PDGFRA,CARD11,RASGRP1,RASGRP3,PSMB10,PLCG2,ICOS,REL,CDKN1B,FGF1,ITPR1,SOS1,CBLB,CD79B,CD79A,SH3KBP1,VAV1,HGF,NFKBIA,NFKBIE,BLNK
Viral carcinogenesis(K)	0.0187	203	35	8.921e-05	0.00071368	RBPJ,C3,LYN,EIF2AK2,IKBKG,JAK1,STAT3,NFKB1,NFKB2,PIK3CD,PIK3R1,STAT5B,SYK,CCND3,CCND2,IRF3,IRF7,IRF9,CREB3L1,REL,CDKN1B,TRADD,TRAF3,TRAF5,HDAC9,HDAC7,HLA-B,HLA-C,HLA-A,HLA-F,HLA-E,SP100,NFKBIA,CASP8,RBL2
Malaria(K)	0.0045	49	14	0.00010562	0.00084493	MYD88,LRP1,CCL2,ICAM1,CD40,IL18,IL6,CR1,HBB,TLR4,CD40LG,HGF,TGFB3,THBS2
ECM-receptor interaction(K)	0.0075	82	19	0.00010842	0.00086738	ITGA1,ITGA8,ITGA5,COL9A2,CD47,RELN,LAMA2,SV2B,TNC,VWF,GP1BA,TNXB,COL4A4,COL4A3,COL6A2,COL6A1,COL6A3,COL6A6,THBS2
Regulation of actin cytoskeleton(K)	0.0197	214	36	0.00011449	0.00091593	MYL9,PDGFB,IQGAP2,PDGFC,PIP5K1B,PIK3CD,ITGA1,ITGAD,ITGA8,ITGA5,ROCK1,ROCK2,SPATA13,PIK3R1,RRAS,RAC2,ARHGEF1,ARHGEF6,PAK1,PDGFRB,PDGFRA,CYFIP2,NCKAP1L,TMSB4X,FGD3,FGF1,F2R,SOS1,PFN1,MYL12A,VAV3,VAV1,WAS,DIAPH1,MYH9,LIMK1
NCAM signaling for neurite out-growth(R)	0.0213	231	38	0.00011695	0.00093557	PSME1,PSME2,PDGFB,JAK1,DUSP5,PSMB8,PSMB9,RASGRF2,KSR1,IL2RG,FYN,COL9A2,KITLG,PDGFRB,PDGFRA,CACNA1C,RASGRP1,RASGRP4,RASGRP3,CACNA1I,PSMB10,CSF2,FGF1,CACNB1,RASAL3,LAT,SOS1,GFRA1,GFRA2,HGF,COL4A4,COL4A3,CSF2RB,RASA4,COL6A2,COL6A1,COL6A3,CAMK2G
Regulation of RAC1 activity(N)	0.0035	38	12	0.00013051	0.0009644	PREX1,ARHGAP9,RASGRF2,SPATA13,ARHGEF6,CHN1,SOS1,VAV3,VAV1,ELMO1,ARHGAP17,DOCK2
TRAIL signaling pathway(N)	0.002	22	9	0.00013777	0.0009644	IKBKB,CASP10,IKBKG,TNFRSF10A,TNFRSF10D,TNFSF10,TRADD,CFLAR,CASP8

## Sheet: C
Whole genome correlation with MYC in melanoma cell lines
Gene name	Estimate	P.value
HLA-B	-0.57175	1.6309e-10
CD163L1	-0.543377	3.01693e-09
MAMDC2-AS1	-0.509604	3.84926e-08
SLC14A1	-0.50491	5.36731e-08
UBE2H	-0.504272	8.71505e-08
COL8A1	-0.50369	9.05892e-08
CDH13	-0.486519	1.88374e-07
DIAPH2-AS1	-0.484945	2.09031e-07
DLG3	-0.484679	3.07966e-07
SPRED3	-0.479001	4.37691e-07
KIF3B	-0.477705	4.73855e-07
SPARC	-0.470555	7.30264e-07
GPR39	-0.46967	5.58814e-07
FRMPD4	-0.466169	6.95482e-07
RP13-631K18.2	-0.465794	7.11866e-07
GS1-257G1.1	-0.463696	8.10496e-07
RGS9	-0.462758	8.58662e-07
TRAM2	-0.462604	1.16885e-06
CHRNA9	-0.460761	9.70462e-07
ADAMTS15	-0.460237	1.00201e-06
UBE2E3	-0.45966	1.38731e-06
SLC25A42	-0.458694	1.46713e-06
ULBP2	-0.458255	1.50483e-06
BEND6	-0.45697	1.62047e-06
FAM3C2	-0.456322	1.68194e-06
HLA-C	-0.45519	1.79457e-06
LINC00346	-0.454169	1.90239e-06
SEC24D	-0.452544	2.08674e-06
NCOA3	-0.451533	2.20974e-06
B2M	-0.448074	2.68503e-06
XKRX	-0.447377	2.16061e-06
MGAT4C	-0.444979	2.48491e-06
SGCB	-0.444515	3.27404e-06
APOL3	-0.444498	2.55529e-06
ZNF75D	-0.443648	3.43519e-06
IL1B	-0.442807	2.81798e-06
RP11-79H23.3	-0.442455	2.87569e-06
ARL4C	-0.442044	3.75296e-06
TAP1	-0.438925	4.45245e-06
MBD5	-0.438705	4.5061e-06
TFE3	-0.438672	4.5142e-06
SERPINB8	-0.437849	4.72123e-06
DAP	-0.437047	4.93134e-06
ERAP1	-0.436717	5.02022e-06
AGO3	-0.435334	5.41035e-06
AC012501.3	-0.434428	4.54075e-06
AJ239322.1	-0.433824	4.69758e-06
PLEKHS1	-0.432904	4.94571e-06
TNFRSF9	-0.432363	5.09766e-06
NRP1	-0.43228	6.37487e-06
TCEAL3	-0.432215	6.39738e-06
ANK3	-0.430347	7.06719e-06
NGEF	-0.428524	6.30775e-06
LINC01119	-0.427488	6.67799e-06
PRAF2	-0.427141	8.37476e-06
RAB27B	-0.426763	6.94894e-06
TEF	-0.425779	8.99643e-06
TLR7	-0.425689	7.36976e-06
CADM2	-0.42546	7.46239e-06
IRF1	-0.425284	9.23261e-06
MAP1B	-0.425087	9.32872e-06
ECE1	-0.422912	1.045e-05
PORCN	-0.422649	1.05943e-05
COLEC10	-0.422221	8.89833e-06
SEC24A	-0.421847	1.10447e-05
GLG1	-0.420573	1.17977e-05
IL7R	-0.419936	1.21921e-05
GJA5	-0.418619	1.0799e-05
SAMD9L	-0.41775	1.36418e-05
PCDHB14	-0.417234	1.40072e-05
CTD-2033D15.2	-0.417181	1.16596e-05
FAM168A	-0.416323	1.4675e-05
FAM161B	-0.416279	1.47079e-05
AC096669.2	-0.416217	1.22715e-05
COL4A6	-0.415864	1.25036e-05
LINC00460	-0.415455	1.27771e-05
CRISPLD2	-0.415334	1.5433e-05
AC005255.3	-0.414499	1.61016e-05
POFUT2	-0.41428	1.6282e-05
IFITM10	-0.414258	1.63001e-05
BIRC3	-0.413351	1.42762e-05
NFE2L3	-0.413346	1.70703e-05
CLIC2	-0.412811	1.46862e-05
IRAK2	-0.411633	1.86113e-05
NSUN6	-0.411545	1.86937e-05
RP5-1059L7.1	-0.411347	1.88805e-05
PAM	-0.411216	1.9006e-05
RP11-818F20.5	-0.411087	1.60725e-05
MAGEC2	-0.410762	1.63474e-05
SERPINB7	-0.410731	1.63739e-05
SYT1	-0.41036	1.6693e-05
ITGA5	-0.409909	2.02936e-05
RAP2C	-0.409513	2.0699e-05
MYL4	-0.409212	1.77187e-05
UGT1A10	-0.408903	1.80052e-05
LRRC17	-0.408701	1.81943e-05
MROH2B	-0.407619	1.92403e-05
MAN2B2	-0.405944	2.47199e-05
C12orf75	-0.405658	2.50715e-05
LRRC38	-0.405404	2.15612e-05
DGKA	-0.40523	2.56076e-05
ITGA11	-0.404762	2.22812e-05
RP11-757G1.6	-0.404391	2.2708e-05
WFDC10B	-0.403236	2.40847e-05
GBP1	-0.402726	2.89635e-05
DPYD	-0.402484	2.93083e-05
CXCL8	-0.402396	2.94347e-05
NR3C1	-0.402089	2.98809e-05
NMNAT2	-0.400892	2.7123e-05
SAMD12	-0.400772	2.7288e-05
RP4-737E23.5	-0.400579	2.75549e-05
ARHGEF28	-0.400551	3.22087e-05
MOB3C	-0.399892	3.32575e-05
AL109763.1	-0.399089	2.97006e-05
CHPF2	-0.398783	3.50958e-05
EHD3	-0.398476	3.5622e-05
RP5-1120P11.1	-0.39847	3.06365e-05
DDX58	-0.397784	3.68332e-05
RP13-463N16.6	-0.397543	3.209e-05
APOBEC3F	-0.396993	3.82647e-05
FAM26E	-0.395983	3.46838e-05
PHEX	-0.395929	3.47784e-05
EFNB2	-0.395269	4.15689e-05
ZNF41	-0.395225	4.16565e-05
GLRB	-0.395148	3.61533e-05
ZSCAN30	-0.394994	4.21191e-05
TNFSF14	-0.394968	3.64762e-05
RP11-71N10.1	-0.394836	3.67157e-05
LINC01468	-0.394761	3.68523e-05
ITGA1	-0.394346	4.34448e-05
IL32	-0.394241	3.78133e-05
PSMB8-AS1	-0.393896	4.43889e-05
PMEPA1	-0.393413	4.54235e-05
ITGA2	-0.393336	4.55901e-05
MPP4	-0.393326	3.95597e-05
STK17A	-0.393193	4.59012e-05
RP11-134N1.2	-0.392907	4.03832e-05
RTN1	-0.392575	4.10492e-05
ADAM28	-0.391851	4.25348e-05
IQSEC2	-0.391732	4.91995e-05
FNDC3B	-0.39148	4.97919e-05
CDC37L1	-0.391238	5.03648e-05
PSMB9	-0.391051	5.08117e-05
PDE1C	-0.390854	5.1289e-05
BCAS4	-0.390293	5.26641e-05
SEMA3C	-0.389964	5.3489e-05
KLHL26	-0.389558	5.45231e-05
NDP	-0.389542	4.76155e-05
HIVEP3	-0.389481	5.47208e-05
NME7	-0.38824	5.80069e-05
PRKCA	-0.388042	5.85471e-05
SSBP2	-0.387899	5.89402e-05
PTGFR	-0.387326	5.30181e-05
SIGLEC15	-0.38713	5.35246e-05
AKR1B10	-0.38633	5.56303e-05
SMIM14	-0.386307	6.34949e-05
NR2F1-AS1	-0.386109	6.40827e-05
SERPINB2	-0.386074	5.63209e-05
CTNNA1	-0.38601	6.43785e-05
PSME2P2	-0.38601	6.43785e-05
GLTP	-0.385582	6.56752e-05
CACNA2D3	-0.385272	5.85333e-05
RASSF8	-0.384857	6.79254e-05
RP5-875H18.9	-0.384531	6.06506e-05
MAGED1	-0.384275	6.97843e-05
SAMHD1	-0.384144	6.17853e-05
TMEM263	-0.38411	7.0319e-05
NMI	-0.384077	7.04264e-05
GGN	-0.38399	6.2243e-05
LRRC15	-0.383241	6.45102e-05
CSRNP1	-0.383155	7.34963e-05
APOL6	-0.382957	7.41703e-05
PINK1	-0.38288	7.44339e-05
SMOC1	-0.382579	6.65785e-05
AAK1	-0.382452	7.59188e-05
USP30-AS1	-0.382278	6.75361e-05
GOSR2	-0.382243	7.66522e-05
GNA15	-0.382028	6.8345e-05
INMT	-0.381848	6.89328e-05
KRT80	-0.381617	7.88922e-05
RILPL2	-0.381419	7.96122e-05
C8orf4	-0.380165	7.46496e-05
YIPF2	-0.379805	8.5726e-05
MYOF	-0.379629	8.64173e-05
STARD13	-0.378992	8.89669e-05
NUB1	-0.378795	8.97724e-05
NSUN7	-0.378659	8.014e-05
SDC4	-0.378399	9.14037e-05
C5AR2	-0.378192	8.19184e-05
RP11-265N7.1	-0.377856	8.32191e-05
AC007879.7	-0.377748	8.36402e-05
CDH6	-0.377293	8.54412e-05
RP11-66B24.5	-0.377002	8.66136e-05
NUCB2	-0.376927	9.7722e-05
PTPRO	-0.3768	8.74358e-05
DMD	-0.376038	0.000101736
RP11-486O13.2	-0.376002	9.07532e-05
LOXL2	-0.375862	0.000102547
LINC00525	-0.375761	9.17751e-05
IL1A	-0.375739	9.18723e-05
TAPBPL	-0.375588	0.000103827
PLCXD3	-0.375332	9.36271e-05
PCDHB10	-0.37517	0.000105799
RP11-1E6.1	-0.374853	9.57326e-05
KRT15	-0.374328	9.80941e-05
FICD	-0.374259	0.000110231
COL5A1	-0.374175	9.87927e-05
SERINC3	-0.374149	0.000110776
LDB2	-0.373219	0.000103257
SMAGP	-0.372952	0.000116886
LIF	-0.372864	0.000117347
SCG2	-0.372348	0.000120087
RP11-280G9.1	-0.372142	0.000108517
RAC2	-0.372129	0.000108579
NLRC5	-0.371755	0.000123309
RP11-863P13.3	-0.371678	0.000110857
SCG5	-0.371656	0.000123854
FAT3	-0.371247	0.000113068
PAPPA	-0.371108	0.000113796
CSNK1A1	-0.37092	0.00012798
LIFR	-0.370887	0.000128168
RBP1	-0.370884	0.000114968
CLN5	-0.370832	0.000128481
SRPX2	-0.370722	0.00012911
RP5-899B16.1	-0.370347	0.00011783
LINC00615	-0.369952	0.000119977
NFE2L3P1	-0.369858	0.000120494
AC116366.5	-0.369847	0.000120557
TSPYL2	-0.369635	0.000135494
MYO7B	-0.369592	0.000121966
CASK	-0.369569	0.000135891
ARHGAP35	-0.369547	0.000136023
PJA2	-0.369492	0.000136354
LINC01080	-0.369429	0.000122878
GCOM1	-0.369407	0.000123003
TMEM167A	-0.36936	0.000137152
HEG1	-0.369338	0.000137286
CCL2	-0.369327	0.000137353
CD82	-0.369218	0.000138022
AXL	-0.368899	0.00013998
RP11-753N8.1	-0.368729	0.000126857
PDGFC	-0.368493	0.000142516
LGALS9	-0.368104	0.000130516
PPP1R3F	-0.367955	0.000145941
CTD-2140G10.2	-0.36777	0.000132508
RP11-212I21.3	-0.367693	0.00013297
RP11-524D16__A.3	-0.367435	0.000134539
TXNRD1	-0.367416	0.000149442
RP5-907D15.4	-0.367403	0.000134735
PLAUR	-0.367318	0.000150093
ABCC3	-0.367286	0.000135452
UBE2HP1	-0.367095	0.000136627
GPR78	-0.366417	0.000140878
CDC42BPA	-0.366044	0.000158729
LINC01358	-0.365863	0.000144447
CREB3	-0.365055	0.000165745
KIAA0825	-0.365018	0.000150048
C1GALT1C1	-0.364814	0.000167504
RP11-400K9.4	-0.364671	0.000168551
FAM20C	-0.364638	0.000168793
CXorf38	-0.364605	0.000169036
CDH9	-0.364539	0.000153308
PCDH19	-0.364472	0.000153771
TAF13	-0.364144	0.00017247
C7orf69	-0.364047	0.000156731
TLE4	-0.36366	0.000176137
TNFRSF11B	-0.363614	0.000159798
P3H1	-0.363605	0.000176558
RRAS	-0.363243	0.000179362
SEC31A	-0.362419	0.000185889
TXNDC15	-0.362309	0.000186776
DOCK5	-0.362024	0.0001891
CASP3	-0.362013	0.00018919
THBS1	-0.361903	0.000190091
LPHN3	-0.361516	0.000175476
BX322557.10	-0.36142	0.000194104
SH3KBP1	-0.361266	0.000195398
GSPT2	-0.361212	0.00017786
BPI	-0.361202	0.000177939
RGP1	-0.360871	0.00019876
CD7	-0.360221	0.000185848
ALPK2	-0.359651	0.000190594
ERMN	-0.359609	0.000190946
CTD-2269F5.1	-0.359459	0.000192216
ANKH	-0.359059	0.000214871
RPS2P32	-0.358767	0.000198177
LAMB1	-0.35874	0.000217825
SAMD9	-0.358608	0.000219058
TCF4	-0.358606	0.000199583
ACTN3	-0.358425	0.000201175
GPKOW	-0.358301	0.000221961
LYPD6B	-0.358297	0.000202316
TGOLN2	-0.358235	0.000222587
PRNP	-0.357905	0.000225745
SERTAD3	-0.357839	0.000226382
GBP5	-0.357811	0.000206687
ASPRV1	-0.357592	0.000208678
SPOCK1	-0.35751	0.000229589
CHST1	-0.357484	0.000209675
RAB23	-0.357235	0.000232295
PLIN3	-0.357071	0.000233932
ROS1	-0.35698	0.000214358
HLA-DQA1	-0.356819	0.000215869
DNAJB5	-0.356675	0.000237905
SLC35A2	-0.356653	0.000238128
RP13-631K18.3	-0.356313	0.0002207
PIN4	-0.356258	0.000242167
PCDHB9	-0.356236	0.000242393
MYPN	-0.356172	0.00022206
SLC9A9	-0.35617	0.000243073
RP11-426C22.4	-0.355938	0.000224344
AC079753.4	-0.355869	0.000225016
UBA6	-0.355533	0.000249737
MAP4K4	-0.355489	0.000250203
PTPRK	-0.355204	0.00025325
BPGM	-0.355116	0.000254195
SLN	-0.354865	0.000235075
AQP1	-0.354798	0.000235763
TRIM22	-0.354611	0.00025969
VEGFC	-0.354113	0.000242887
OTOGL	-0.353754	0.000269259
ZNFX1	-0.35371	0.000269758
FAF2	-0.353688	0.000270008
RP11-351O2.1	-0.353613	0.000248202
RANBP6	-0.353589	0.000271136
IL6STP1	-0.353297	0.000251622
TMEM167B	-0.353194	0.000275691
TMED9	-0.352634	0.000282265
CTD-2015B23.2	-0.352501	0.000260427
KIAA0513	-0.352381	0.000285277
RP1-122P22.2	-0.352361	0.000262002
RP11-451B8.1	-0.352233	0.000263452
MVP	-0.352128	0.000288319
RP11-42A4.1	-0.352072	0.000265292
C1orf110	-0.35204	0.00026566
TRIM16	-0.351898	0.000291122
CTD-2095E4.5	-0.351783	0.000268612
SLC6A6	-0.351755	0.000292871
ITGA3	-0.351063	0.00030148
CMAHP	-0.350991	0.000277914
AC005618.6	-0.35087	0.00027937
RP11-12K11.2	-0.350857	0.000279517
FHAD1	-0.35077	0.000280561
CTC-338M12.13	-0.350685	0.000281588
NHS	-0.350474	0.000284156
CAMK2N1	-0.350338	0.000310751
CKAP4	-0.350327	0.000310894
AC104809.2	-0.350307	0.000286193
RP11-122C5.3	-0.350291	0.000286386
AC104820.2	-0.350126	0.000288422
GPX8	-0.350042	0.000314619
SRGAP3	-0.349877	0.000316787
RP11-513I15.6	-0.349866	0.000316932
CT45A5	-0.349674	0.000294055
RP11-145M4.3	-0.34967	0.000294097
LINC00950	-0.349628	0.000294622
ZNF474	-0.349583	0.000295196
VGLL3	-0.349571	0.000295353
CH17-437K3.1	-0.349355	0.000298082
CHI3L2	-0.34935	0.000298153
RGS18	-0.349281	0.000299025
TAPBP	-0.349196	0.000325896
XIAP	-0.349174	0.000326194
GBP2	-0.349064	0.000327686
DEFB124	-0.348838	0.000304728
RP11-115C10.1	-0.348751	0.000305867
RUSC2	-0.348658	0.000333265
SMPD1	-0.348647	0.000333417
ZNF674	-0.348614	0.000333873
2008-09-01	-0.348581	0.00033433
SH3BGRL3	-0.348548	0.000334788
DNAH7	-0.348504	0.000335399
CARD10	-0.348032	0.000342031
PRLR	-0.347876	0.00031747
B3GALT5-AS1	-0.347819	0.000318238
OLFML2A	-0.347175	0.000354373
ARF4P1	-0.346915	0.000330684
CNN2	-0.346681	0.000361679
MYO18B	-0.346621	0.000334827
ANGPT1	-0.346549	0.000363651
FOCAD	-0.346538	0.000363815
ELK1	-0.346461	0.00036497
SAR1B	-0.346033	0.000371469
C11orf44	-0.345593	0.000349687
C5orf56	-0.345352	0.00038202
GS1-600G8.5	-0.345294	0.000354117
YIPF5	-0.345275	0.000383228
SH3PXD2A-AS1	-0.34527	0.000354472
KIAA0319	-0.345123	0.000356675
MTERF1	-0.3451	0.000386003
RP1-152L7.5	-0.344737	0.000391786
G6PD	-0.344375	0.000397649
FOXF1	-0.344131	0.000371862
NEURL3	-0.344061	0.000372971
FEZ2	-0.343924	0.000405046
ARSJ	-0.343903	0.000375438
MCFD2	-0.34388	0.000405775
WNT9A	-0.343705	0.000378581
RP11-686D22.7	-0.343561	0.000380862
DYNLT3P1	-0.343065	0.000388853
FPR3	-0.34297	0.000390394
ITGA4	-0.342541	0.000428581
LAPTM5	-0.342158	0.000403859
THAP2	-0.342057	0.000437092
AIG1	-0.341871	0.000440422
MILR1	-0.341851	0.000409063
VCAM1	-0.341834	0.000409348
WNT5A	-0.341783	0.000441997
LNX1	-0.341573	0.000413834
CDK14	-0.341563	0.000445957
RASSF4	-0.341464	0.00044775
UBQLN2	-0.34142	0.000448549
NETO1	-0.341348	0.000417718
CSMD3	-0.341169	0.000420843
TNFAIP1	-0.341058	0.000455191
ARHGAP26	-0.340849	0.000459056
GALNT2	-0.340531	0.000465013
SYTL5	-0.340473	0.000433183
TNFRSF1A	-0.340157	0.000472089
FAM127C	-0.339628	0.000448589
RP4-798A10.2	-0.339459	0.000451747
DNMBP	-0.339388	0.00048697
CDH2	-0.339367	0.000487401
RP5-1172A22.1	-0.339091	0.000458666
PI4K2B	-0.338773	0.000499184
IL12RB1	-0.338613	0.000467792
KLHL5	-0.338554	0.000503615
KCTD10	-0.338312	0.00050853
GULP1	-0.338136	0.000512132
CCBE1	-0.338019	0.00047936
AJUBA	-0.337884	0.000517351
COL16A1	-0.337642	0.00052239
TRAM1L1	-0.337488	0.00052562
MAN1B1	-0.337335	0.000528868
SEC14L2	-0.337247	0.000530732
ATP1B1	-0.337049	0.000534949
BCAR3	-0.336994	0.000536126
DOK6	-0.336958	0.000500718
RP11-1094H24.4	-0.336915	0.000501585
BCL10	-0.336588	0.000544908
U47924.6	-0.336258	0.000552127
BRINP2	-0.335939	0.000522016
ANO10	-0.335896	0.000560168
NKX3-1	-0.335826	0.000524428
PRRT3	-0.335698	0.0005646
LIMCH1	-0.335676	0.000565094
FAM114A1	-0.335566	0.000567572
LINC00519	-0.335495	0.000531575
KLRC2	-0.335014	0.000542084
TMEM59L	-0.334987	0.00054268
RP4-737E23.2	-0.334675	0.000549623
RP13-497K6.1	-0.334526	0.000552959
THSD4	-0.334523	0.000591616
F2RL3	-0.334453	0.000554602
KIAA1683	-0.334409	0.000555596
RASGRF2	-0.334162	0.000561202
CEP72	-0.334018	0.000603592
RP11-686D22.8	-0.333804	0.000569409
TCAF1	-0.333765	0.000609663
CTD-2339F6.1	-0.333738	0.000570922
SIRPG	-0.33373	0.000571117
BDNF	-0.333634	0.000612852
LINC00355	-0.333546	0.000575388
CTC-378H22.1	-0.333451	0.000577611
RP11-401O9.3	-0.333413	0.000578495
ERRFI1	-0.333326	0.000620355
MX2	-0.33322	0.000583038
AC108462.1	-0.33298	0.000588722
CPA4	-0.33285	0.000591823
COL13A1	-0.3327	0.000635889
SLC9A5	-0.33259	0.000638651
CASP9	-0.332447	0.000642258
F2RL2	-0.332433	0.000601883
LINC01204	-0.332282	0.000605553
CENPBD1P1	-0.332173	0.000649247
PCDHB8	-0.332157	0.000608613
SIRPG-AS1	-0.332003	0.000612399
UBC	-0.331931	0.000655455
ELL2P1	-0.331895	0.000615089
IFI44L	-0.331475	0.000625556
SOCS5	-0.331316	0.000671505
RP11-1299A16.3	-0.331314	0.000629633
WNT7B	-0.331184	0.000632917
TANC2	-0.331173	0.000675282
RP11-166D19.1	-0.331064	0.000678201
RP11-96H17.1	-0.330609	0.000647706
CSF2	-0.330525	0.000649892
INHBA-AS1	-0.330488	0.000650856
APOL1	-0.330318	0.000655322
FAM127A	-0.330317	0.000698357
PPAP2A	-0.330295	0.000698958
TAGLN3	-0.330225	0.000657753
MTF1	-0.330141	0.000703179
IDS	-0.330141	0.000703179
LAMB3	-0.330097	0.000704389
GPR68	-0.330065	0.000661985
INPP5J	-0.330018	0.000663227
RASAL3	-0.330005	0.000663578
SP140L	-0.329943	0.00070864
RP11-373E16.4	-0.329928	0.000665624
STXBP5-AS1	-0.329842	0.000667934
TRANK1	-0.329713	0.000715061
C5orf15	-0.32968	0.000715982
ITGB5	-0.329295	0.000726815
FAM65C	-0.32927	0.000683368
TAF9B	-0.329153	0.000730876
CA3	-0.328934	0.000692601
SMURF2	-0.328889	0.000738429
REM1	-0.328802	0.00069626
ABAT	-0.328615	0.000701452
RP11-327F22.2	-0.328241	0.000711975
LRRC66	-0.328044	0.000717601
ST8SIA5	-0.328003	0.000718768
UHRF1BP1L	-0.327988	0.00076478
IFI44	-0.327835	0.000769364
NNMT	-0.327626	0.000775626
AC003092.1	-0.327468	0.000734191
ISG15	-0.327384	0.000782934
CXCL2	-0.327363	0.000737273
MBNL1-AS1	-0.32734	0.00078427
ABCG2	-0.327221	0.000741443
TBX3	-0.327143	0.000790306
PGPEP1	-0.327088	0.00079199
RP11-603J24.7	-0.327083	0.00074549
PLA2R1	-0.327069	0.000745897
ANKRD42	-0.326978	0.000795369
CLIP3	-0.326967	0.000795707
LINC00707	-0.326953	0.000749349
TRHDE	-0.326929	0.000750072
COL7A1	-0.326824	0.000800121
TNFRSF12A	-0.326583	0.000807641
PLAA	-0.326528	0.000809359
AC093673.5	-0.326429	0.00081246
CD1D	-0.326362	0.000767096
ATP6AP2	-0.326198	0.000819738
PCDHB6	-0.32606	0.000776297
ARNTL2	-0.326023	0.000777417
STC1	-0.325913	0.000828832
BRAF	-0.325792	0.000832707
ETV6	-0.325594	0.000839084
C5orf46	-0.325534	0.000792585
CTD-3060P21.1	-0.325504	0.000793529
C6orf89	-0.325462	0.00084336
ATF7IP	-0.325451	0.000843717
CTD-2555O16.4	-0.325309	0.000848374
ADRA1D	-0.32524	0.00080181
STX1A	-0.324891	0.000862121
TET2	-0.324639	0.000870541
RP11-279O17.1	-0.324594	0.000822454
SLITRK6	-0.324521	0.000824809
VPS9D1	-0.324441	0.000877183
TRIM56	-0.324386	0.000879036
CTC-487M23.5	-0.324359	0.000830072
JAM2	-0.324237	0.000834072
RP13-349O20.2	-0.324172	0.000836219
FTSJ1	-0.324133	0.000887607
H1F0	-0.324101	0.00088873
ITPKA	-0.324014	0.000841392
KCNMA1	-0.323777	0.000849249
ANTXR2	-0.323739	0.000850529
LINC00657	-0.323661	0.000903836
DENND2A	-0.323639	0.000904598
RP11-815N9.2	-0.323544	0.000857051
SEMA3A	-0.323485	0.000909944
MYL6	-0.323485	0.000909944
GXYLT2	-0.32342	0.000912244
RP1-240K6.3	-0.323284	0.000865831
MAN2A1	-0.323123	0.000922661
SPANXC	-0.323103	0.00087199
SAMD14	-0.322814	0.000881869
SGMS1	-0.322695	0.0009379
HLA-F	-0.322662	0.000939081
RP11-403P17.4	-0.322559	0.000890698
RP11-274E7.2	-0.322475	0.000945804
CCR3	-0.32239	0.000896588
ERO1LB	-0.322255	0.000953768
CLPSL1	-0.322147	0.00090513
PPP1R18	-0.321937	0.000965426
ADAMTS9-AS2	-0.321553	0.00097967
B4GALT1	-0.321553	0.00097967
C11orf49	-0.321542	0.000980079
FAM174A	-0.321509	0.00098131
DRP2	-0.32148	0.000928958
HLA-DOA	-0.321444	0.000930269
BIRC2	-0.321421	0.000984597
KIAA0232	-0.321355	0.00098707
JAKMIP2	-0.321344	0.000933871
DOCK11	-0.321311	0.000988721
CYP4F11	-0.321256	0.000937088
GDI1	-0.321223	0.000992031
CTD-2090I13.1	-0.321036	0.000945134
CASC20	-0.321025	0.000945539
RP4-781K5.4	-0.321006	0.000946206
RP11-92C4.4	-0.320992	0.000946721
ZNF488	-0.320872	0.000951167
FAM46A	-0.320872	0.00100537
RP3-410C9.2	-0.320671	0.000958588
NDNF	-0.320513	0.000964509
RP11-551L14.4	-0.320505	0.000964789
ORAI2	-0.32041	0.00102314
PURB	-0.319949	0.00104118
SLC12A8	-0.319927	0.00104205
SERPINB10	-0.319614	0.000998667
C15orf54	-0.3195	0.00100306
RP11-206L10.9	-0.319323	0.00106614
IL6ST	-0.31929	0.00106747
APBB2	-0.319224	0.00107013
CTD-2215E18.1	-0.319192	0.00101504
LARP6	-0.31918	0.00107191
RP11-187C18.3	-0.319069	0.00101988
GIMAP8	-0.319038	0.00102109
LINC00865	-0.318986	0.00102316
SUSD4	-0.318985	0.00102319
PGRMC1	-0.318983	0.00107994
ST8SIA4	-0.318771	0.00103168
MTX3	-0.31873	0.00109029
FPR1	-0.318716	0.00103388
UBE2L6	-0.318675	0.00109255
ING2	-0.318653	0.00109346
SMAD3	-0.318576	0.00109663
ACY3	-0.318549	0.00104052
VEGFA	-0.318521	0.00109891
IFNAR1	-0.31851	0.00109936
AP000688.14	-0.318435	0.0010451
C12orf79	-0.318387	0.00104706
SERPINH1	-0.31828	0.00110896
SLC4A8	-0.318156	0.00105638
LRRC7	-0.318008	0.00106243
SNX21	-0.317972	0.00112187
CTD-2128A3.2	-0.317896	0.00106702
EPHB2	-0.317841	0.00106925
CDC14B	-0.317807	0.00112885
SPTLC3	-0.317751	0.00107294
HLA-DOB	-0.317536	0.00108183
RP11-111F5.2	-0.317337	0.00109014
EXT2	-0.317203	0.00115477
PID1	-0.316951	0.00110641
PGAM1P7	-0.316916	0.00110786
LGALS1	-0.316885	0.00116865
INHBA	-0.316866	0.00110998
DCBLD2	-0.316841	0.00117058
LCTL	-0.316757	0.00111466
BMP2	-0.316655	0.00111898
LEPR	-0.316577	0.0011822
TMTC3	-0.316577	0.0011822
MMP2	-0.316446	0.00118805
SLC39A7	-0.316424	0.00118903
LINC00922	-0.316377	0.00113097
B3GALT5	-0.316226	0.00113751
NR2F1	-0.31582	0.0012162
SECTM1	-0.315727	0.00115937
NUP54	-0.315677	0.00122271
ANKEF1	-0.315508	0.00116908
TNC	-0.315468	0.00123227
IL37	-0.315413	0.00117335
OTUD5	-0.315292	0.00124038
EPHA2	-0.315237	0.00124293
KY	-0.315139	0.00118566
DDA1	-0.315007	0.00125366
RP3-428L16.2	-0.314827	0.0011998
CLSTN3	-0.314688	0.00126862
APOBEC3G	-0.314634	0.00120862
RP11-876N24.3	-0.314624	0.0012091
ABHD8	-0.314578	0.00127382
AL121578.2	-0.314479	0.00121575
DAO	-0.31433	0.00122268
RPSAP52	-0.314223	0.00122764
TBC1D8B	-0.314183	0.0012927
LINC01137	-0.314084	0.00129745
TOX2	-0.314045	0.00123597
SPRY3	-0.313898	0.00130648
KIF2A	-0.313887	0.00130702
OASL	-0.313852	0.00124504
IMPDH1P10	-0.313851	0.00124509
LTBP1	-0.313832	0.00130968
PCED1B	-0.313831	0.00124604
CHD2	-0.313766	0.00131289
DSTNP2	-0.313601	0.00132094
LMAN1	-0.313502	0.0013258
UNC5C	-0.313454	0.00126396
RRAD	-0.313423	0.00126542
GPC1	-0.313348	0.00133338
ARL3	-0.313304	0.00133555
PVRL3	-0.313239	0.00133882
AC126365.1	-0.313193	0.00127649
RP11-403P17.2	-0.313056	0.00128311
ELL2	-0.312931	0.00135415
RP13-895J2.4	-0.312748	0.00129813
TMEM185A	-0.312657	0.00136798
RP11-766H1.1	-0.312599	0.00130546
XXbac-BPG299F13.17	-0.312503	0.00137578
INTS4P2	-0.312391	0.00131574
RP11-12K22.1	-0.312206	0.00132495
XAF1	-0.312162	0.00132714
WBP5	-0.312129	0.0013949
PDZD2	-0.312045	0.001333
SLC35D1	-0.311965	0.0014034
MYH1	-0.311886	0.001341
DRAP1	-0.311866	0.00140853
CTTNBP2NL	-0.311778	0.0014131
WDR44	-0.311701	0.00141712
RP11-427J23.1	-0.311469	0.00136217
FBLN7	-0.311448	0.00143037
HTR7	-0.311437	0.00143095
PRSS3	-0.31142	0.00136469
NSD1	-0.311317	0.00143733
PCNPP3	-0.311218	0.00137511
DPM1	-0.311108	0.00144842
LINC00565	-0.310904	0.00139138
HTR1D	-0.310901	0.00139156
RPS6KC1	-0.310899	0.00145958
UGGT1	-0.310811	0.0014643
RP11-541M12.6	-0.310804	0.00139662
MOV10L1	-0.310639	0.00140527
CITED2	-0.310603	0.00147557
SLC22A4	-0.310488	0.00141326
PRRC1	-0.310449	0.00148393
RP11-517I3.2	-0.310026	0.00143793
GABRE	-0.309994	0.00143964
CYLD	-0.309779	0.00152085
AP001471.1	-0.309741	0.00145332
FAM101A	-0.309281	0.00147848
FOXC2	-0.309177	0.00148422
CFI	-0.309146	0.00148594
TMEM30A	-0.309076	0.00156048
NDRG4	-0.309011	0.00149345
NPBWR1	-0.308752	0.00150792
DISP1	-0.308648	0.00158509
LINC00237	-0.308642	0.0015141
RP4-545K15.5	-0.308611	0.00151587
MYDGF	-0.30856	0.00159018
KIAA1217	-0.308505	0.00159337
SLC9A7	-0.308505	0.00159337
SULF2	-0.308395	0.00159976
ZNF175	-0.308384	0.0016004
CLDN4	-0.308376	0.00152917
STAC2	-0.308321	0.00153233
LINC01583	-0.30828	0.00153465
RNF217	-0.308198	0.00161134
RND3	-0.308088	0.0016178
SPRYD3	-0.308088	0.0016178
PAPPA2	-0.308078	0.00154624
RSAD2	-0.307954	0.00155336
SYNPO	-0.30789	0.00162949
PRDM1	-0.307858	0.0015589
IL31RA	-0.307767	0.00156419
ATP2B1	-0.307758	0.00163733
LSP1P2	-0.307731	0.00156624
DDOST	-0.307648	0.00164388
ZC3H12D	-0.307639	0.00157162
ZNF184	-0.307637	0.00164454
RP6-74O6.6	-0.307319	0.00159037
RP11-673E1.3	-0.307302	0.0015914
AC005336.4	-0.307158	0.00159988
HMGN1P13	-0.306978	0.00161058
SP100	-0.306847	0.00169248
AC021218.2	-0.306765	0.00162333
ARHGAP40	-0.306712	0.0016265
FBXW11	-0.306704	0.00170127
PCDHGC5	-0.306609	0.0016327
S100A2	-0.306528	0.00171214
GAS6	-0.306528	0.00171214
SSFA2	-0.306451	0.00171692
SYT11	-0.306374	0.00172171
ZFP37	-0.306166	0.00173477
CTD-2555O16.2	-0.306166	0.00173477
PCSK5	-0.306161	0.00165992
ATG12	-0.306122	0.00173753
NUAK1	-0.306111	0.00173822
PSMB8	-0.3061	0.00173891
COL6A2	-0.305935	0.00174931
SSPO	-0.305818	0.00168111
PDZK1	-0.305803	0.00168201
RP11-128P17.4	-0.305761	0.00168461
IL15RA	-0.305557	0.00169732
CCL5	-0.305351	0.00171023
POFUT1	-0.305342	0.00178721
TRBV25OR9-2	-0.305338	0.0017111
MAPRE3	-0.305298	0.00179005
RPGRIP1	-0.305226	0.00171813
SRPK3	-0.30513	0.00172423
EGFR	-0.304961	0.00173496
SPANXB2	-0.30496	0.00173504
RPLP0P2	-0.304914	0.00181505
BIN2	-0.304748	0.0017486
CTD-2334D19.1	-0.304412	0.0017703
NRIP1	-0.304299	0.0018557
RGAG4	-0.304299	0.0018557
PRR16	-0.304288	0.00185644
ZNF365	-0.304233	0.00186011
HLA-A	-0.304156	0.00186526
C16orf45	-0.303994	0.00179758
PGM2L1	-0.303958	0.00187856
CLIC4P3	-0.303906	0.00180341
AC108676.1	-0.303895	0.00180412
IDO1	-0.303738	0.00181454
CLIC5	-0.303532	0.00182824
STAC	-0.303509	0.00182982
FAM3C	-0.303255	0.00192657
LINC00686	-0.30318	0.00185196
DOCK11P1	-0.303126	0.00185562
FHL1	-0.303113	0.00193645
GPR176	-0.303058	0.00194027
GLIS3	-0.303049	0.00186079
NRD1	-0.302992	0.00194486
RP11-399B17.1	-0.30289	0.00187166
AC002456.2	-0.302846	0.00187466
HSD17B4	-0.302805	0.0019579
KPNA6	-0.302739	0.00196253
DAW1	-0.302706	0.00188423
C9orf3	-0.302684	0.00196639
RP11-713C5.1	-0.302646	0.00188836
PSMB10	-0.302245	0.00199753
ITCH	-0.302157	0.00200381
AP000695.4	-0.302144	0.00192324
AC241585.2	-0.302109	0.00192571
MPP5	-0.301992	0.00201563
TLR2	-0.301914	0.00193939
NEK10	-0.301898	0.00194055
RFFL	-0.301663	0.00203947
CDK16	-0.301465	0.0020539
POU2F2	-0.301436	0.00197334
LPPR2	-0.301289	0.0020668
KLF4	-0.301278	0.00206761
NTM	-0.301256	0.00206923
EIF4G3	-0.301136	0.00207815
MAP3K7CL	-0.301125	0.00207896
EVI5L	-0.30107	0.00208303
ERLEC1	-0.301059	0.00208385
IL4I1	-0.301055	0.00200085
FPR2	-0.301004	0.00200451
SLC6A9	-0.300949	0.00209201
LINC00535	-0.300945	0.0020088
KCNN3	-0.300905	0.00209528
RP11-798M19.6	-0.300806	0.00210266
TCAF1P1	-0.300795	0.00210348
NTSR1	-0.300789	0.00202019
PTGER3	-0.300739	0.00202391
CMYA5	-0.300725	0.00202493
MRFAP1L1	-0.300674	0.00211254
RUNX2	-0.300565	0.0021208
RP11-1060G2.2	-0.3005	0.0020415
GDA	-0.300387	0.0020498
FGF1	-0.300367	0.00213575
FLRT3	-0.300334	0.00213825
RP11-116D17.4	-0.300131	0.00206887
RP11-105N14.1	-0.300115	0.00207007
SLFN5	-0.300048	0.00216003
WI2-87327B8.2	-0.299997	0.00207889
ZBTB38	-0.299938	0.00216846
SOCS1	-0.299937	0.00208343
RGS7	-0.299797	0.00209398
CLCF1	-0.299664	0.00218967
KCTD17	-0.29962	0.00219308
RAET1G	-0.299565	0.00211157
SAMD8	-0.299543	0.00219906
Y_RNA	-0.29953	0.00211428
MMP19	-0.299467	0.00211907
RP11-395N3.2	-0.299458	0.00211975
SIPA1L1	-0.299356	0.00221365
CALML3-AS1	-0.29912	0.00214573
RP11-177H13.2	-0.299072	0.00214946
MED10	-0.298939	0.00224656
MCU	-0.29884	0.00225443
ARNTL	-0.298621	0.00227198
ARAF	-0.298533	0.00227904
RP11-804H8.6	-0.298425	0.00220007
OS9	-0.298346	0.00229411
SLC14A2	-0.298312	0.00220903
ASTN1	-0.298249	0.00221399
LINC00314	-0.298217	0.00221656
ZNF599	-0.298104	0.00231373
RTP3	-0.298004	0.00223357
SLC9C2	-0.297984	0.00223515
ARRDC3	-0.297962	0.0023254
POLD4	-0.297885	0.00233171
HPCAL1	-0.297731	0.00234437
NR2F2-AS1	-0.297698	0.00234709
CPE	-0.297649	0.00226214
ZNF355P	-0.297611	0.00226527
COL4A4	-0.297573	0.00226835
RP11-320G24.1	-0.29755	0.00227021
YPEL5	-0.297445	0.00236804
RP11-276E17.2	-0.297431	0.00227992
LUCAT1	-0.297397	0.00228266
GSG1	-0.297389	0.0022833
OTOR	-0.297367	0.00228509
PCDHB13	-0.297347	0.00237629
FAM131B	-0.297321	0.0022889
CYP2S1	-0.297174	0.00230094
RARRES3	-0.297127	0.0023947
DNAH5	-0.296984	0.00240674
FBXL17	-0.296962	0.0024086
RP11-148K1.10	-0.296939	0.00232037
EDEM3	-0.296743	0.00242724
CAPN6	-0.296669	0.00234285
RP3-510O8.3	-0.296665	0.00234315
RASSF5	-0.2966	0.00243943
PCNXL2	-0.296523	0.00244601
RARS	-0.296457	0.00245167
RP11-374M1.3	-0.296318	0.00237236
PRIMPOL	-0.296314	0.00246396
RP11-401O9.4	-0.2963	0.00237388
COL6A1	-0.29627	0.00246776
ANKIB1	-0.296182	0.00247537
FAM122C	-0.296106	0.00248204
SLC15A3	-0.296023	0.00239747
CTD-3128G10.7	-0.296018	0.00239789
AC098614.2	-0.295985	0.00249256
FAM182A	-0.295982	0.00240093
TXNDC2	-0.295903	0.00240774
RP11-45L9.1	-0.295866	0.00241088
WFDC3	-0.295767	0.00241945
CMTM1	-0.295727	0.00242283
ROBO4	-0.295658	0.00242878
PTPRF	-0.295644	0.00252242
AC007566.10	-0.295637	0.00243067
FAT4	-0.295403	0.0025438
C16orf46	-0.295326	0.00255064
BACE1	-0.295271	0.00255554
CADM3-AS1	-0.295053	0.00248157
CDH12	-0.294882	0.00249673
CST7	-0.294663	0.00251621
SKAP2	-0.294546	0.00262095
RASGEF1B	-0.29454	0.00252716
LINC00706	-0.294519	0.00252903
ADK	-0.294502	0.00262497
DNAH2	-0.294459	0.00253445
NR2F2	-0.294425	0.002632
QSOX1	-0.294348	0.00263906
GRIK2	-0.294337	0.00264007
RP11-356J5.12	-0.294326	0.00264107
GRAMD3	-0.294315	0.00264208
LINC00205	-0.294315	0.00264208
C15orf56	-0.294306	0.0025482
LINC01252	-0.294227	0.00255538
BSDC1	-0.294206	0.0026522
KCTD11	-0.293986	0.00267254
RP5-1097F14.3	-0.293942	0.00258128
LPAR1	-0.293899	0.0025852
PIGT	-0.293865	0.00268378
HLA-DQB1	-0.293844	0.00259022
RP11-380P13.1	-0.293837	0.00259084
ABCC6P2	-0.293697	0.00260371
RP11-60L3.1	-0.293601	0.00261256
RP11-742D12.2	-0.293549	0.00261739
FGF2	-0.293525	0.0027157
NLRP3	-0.293515	0.00262052
ACSL5	-0.293399	0.00263125
RP11-162J8.3	-0.293192	0.00265054
IQUB	-0.29313	0.00265634
RP11-54A9.1	-0.293102	0.00265895
C1QTNF1	-0.292975	0.00276791
CTA-392C11.1	-0.292923	0.00267583
MECOM	-0.292899	0.00267803
NID1	-0.292877	0.0027774
ACKR1	-0.29276	0.00269118
TIPARP	-0.292701	0.00279435
P4HA3	-0.292624	0.0028018
GLIPR1	-0.292613	0.00280286
KDM4A	-0.292602	0.00280393
RAB13	-0.292591	0.00280499
VSNL1	-0.292201	0.00274471
NLGN2	-0.292174	0.00284576
LPIN2	-0.292119	0.00285116
RP11-211G23.2	-0.29209	0.00275535
SEC22B	-0.292086	0.00285441
Z82214.3	-0.291779	0.00278563
HLA-DRB1	-0.291745	0.00288816
KRT16	-0.29165	0.00279831
RP11-815M8.1	-0.291596	0.00280364
TSPAN13	-0.291548	0.00290791
HLA-DRA	-0.291405	0.00292226
GLT8D2	-0.291351	0.00282774
DLG4	-0.291306	0.00293223
NF2	-0.291284	0.00293445
RAPH1	-0.291141	0.00294891
TMEM47	-0.291119	0.00295114
GRIA1	-0.290955	0.00286731
GRIK1	-0.290762	0.00288672
GOLPH3	-0.290746	0.0029893
BMP1	-0.290702	0.00299382
RP11-367F23.2	-0.290687	0.00289423
GAS6-AS2	-0.290615	0.00290152
STRA6	-0.290562	0.0029069
RP11-348P10.2	-0.290479	0.00291543
RP11-160O5.1	-0.29039	0.00292448
GIMAP1	-0.290326	0.00293096
HSPA5	-0.290318	0.00303362
CD93	-0.289903	0.00297459
GCNT1	-0.289878	0.00307969
RP1-78O14.1	-0.289822	0.00298296
ZNF436	-0.289758	0.00309247
OTOS	-0.289722	0.00299343
CSMD2	-0.289697	0.00299597
ARFIP1	-0.289681	0.00310063
MCL1	-0.289615	0.00310763
RAB22A	-0.289571	0.00311231
TMEM178B	-0.28956	0.00311348
RP13-297E16.4	-0.289396	0.00302763
SELPLG	-0.289296	0.0031417
LMBRD2	-0.289153	0.00315708
NREP	-0.289077	0.00316539
MMP7	-0.289047	0.00306458
C22orf15	-0.289026	0.00306683
C1R	-0.288802	0.00319524
CIITA	-0.288781	0.00309303
NIPBL	-0.288747	0.00320123
PDGFRA	-0.288692	0.00320724
DYNLT3	-0.288687	0.00310314
EFHC1	-0.288615	0.00321567
CNTNAP2	-0.288581	0.00311453
INHBB	-0.288554	0.00311745
NKX6-1	-0.288513	0.00312187
SLIT2	-0.288484	0.00323017
ST3GAL3	-0.288407	0.00323865
NBEA	-0.288363	0.00324351
UBA1	-0.288286	0.00325202
SYNDIG1	-0.288235	0.00315212
EPS15P1	-0.288119	0.00316487
ARSK	-0.288011	0.0032826
PELO	-0.287847	0.00330107
CTC-543D15.8	-0.287805	0.00319944
RP11-93B14.9	-0.287797	0.00320038
GLTPP1	-0.287704	0.00321064
ARRDC3-AS1	-0.287685	0.00321278
RP1-102K2.8	-0.287684	0.00321289
ABCC11	-0.287594	0.00332957
RSPRY1	-0.287594	0.00332957
DLG1-AS1	-0.287571	0.00322542
GRAMD4P5	-0.287518	0.00323141
2001-12-01	-0.287506	0.00323276
RP11-490M8.1	-0.287484	0.00323521
LINC00290	-0.287478	0.00323588
CCDC186	-0.287451	0.00334577
YKT6	-0.287352	0.00335704
MIR222HG	-0.287308	0.00336205
LYSMD3	-0.287253	0.00336833
MYL6B	-0.287231	0.00337085
PGM3	-0.287199	0.00337462
MYLK	-0.287177	0.00337714
TBC1D19	-0.287144	0.00338092
FAM107B	-0.287067	0.00338976
RP11-876N24.1	-0.287047	0.00328438
LINC01185	-0.287046	0.00328455
TGFBR2	-0.286924	0.00340623
RP11-665G4.1	-0.28691	0.00329997
GLDN	-0.286897	0.00330143
LINC00936	-0.286781	0.00342277
IL1RAPL1	-0.286667	0.00332776
PDLIM5	-0.286616	0.00344195
C10orf10	-0.286562	0.00344836
MAML2	-0.286562	0.00344836
CHIC2	-0.286507	0.00345479
TMCC3	-0.286408	0.00346638
RP4-591C20.9	-0.286353	0.00347283
LYZL6	-0.286334	0.00336616
GPR115	-0.286236	0.00337747
HS3ST3A1	-0.28618	0.00338397
RIBC1	-0.286146	0.00338799
CXCL11	-0.286138	0.00338885
LINC01326	-0.286055	0.00339861
GS1-44D20.1	-0.28599	0.00351571
CSF2RB	-0.285949	0.00341105
DOPEY2	-0.285859	0.00353141
RTL1	-0.285815	0.00342674
CPZ	-0.285704	0.00343984
TAPT1	-0.285672	0.00355377
FKTN	-0.285672	0.00355377
PSD4	-0.285661	0.00355509
RP11-19P22.7	-0.285639	0.00344753
PLOD1	-0.285617	0.00356037
GCC1	-0.285606	0.0035617
CELA1	-0.285588	0.00345351
AC007285.6	-0.285466	0.00346808
IFT74	-0.285299	0.00359888
IGFBP5	-0.285244	0.00360555
PAGE2	-0.285193	0.0035007
FOXJ2	-0.285189	0.00361224
GNAI2	-0.285156	0.00361626
FRMD6	-0.285123	0.00362028
CCRL2	-0.285104	0.00351138
RP11-304L19.2	-0.285056	0.00351712
TNFSF18	-0.285023	0.00352121
KCNN4	-0.284914	0.00364584
CR848007.2	-0.28484	0.00354335
IKZF2	-0.284738	0.0036675
AP000708.1	-0.284696	0.00356082
RP11-328N19.1	-0.28466	0.00356519
RP11-7F17.1	-0.284613	0.00357093
EBI3	-0.284592	0.00357351
RP11-733O18.1	-0.284578	0.00357525
LRRC73	-0.284379	0.00359962
RP11-320M2.1	-0.284262	0.003614
TRERF1	-0.284256	0.00361481
RP11-484O2.1	-0.28416	0.00362671
PHF21A	-0.284145	0.00374143
Metazoa_SRP	-0.28414	0.00362911
FAM153B	-0.284109	0.00363299
RP11-839D17.3	-0.28402	0.00364408
KRT17	-0.283952	0.00365247
AC112721.1	-0.283909	0.00365784
POU2F3	-0.283872	0.00366249
IL13RA1	-0.283838	0.00378029
MAP6	-0.283783	0.00378727
PCBP3-OT1	-0.283627	0.00369325
MYOM3	-0.283561	0.00370156
DNAH12	-0.283364	0.00372654
RNF215	-0.283322	0.00384634
DHX29	-0.283245	0.00385626
SLC2A2	-0.283236	0.0037428
LINC01510	-0.283204	0.00374687
P4HA2	-0.283157	0.00386764
TIMP1	-0.283113	0.00387333
ZNF217	-0.282992	0.00388904
RGS16	-0.282959	0.00389333
HLA-DMA	-0.282827	0.00391054
IL36RN	-0.28281	0.00379738
AP3S1	-0.282794	0.00391486
RP11-44F14.6	-0.282776	0.00380188
COL4A1	-0.282674	0.00393071
HARS2	-0.282509	0.00395243
CYYR1	-0.282407	0.00384982
CTC-487M23.6	-0.282292	0.0038648
TNFSF4	-0.282245	0.0039874
ATP5F1P5	-0.282116	0.003888
USP11	-0.282004	0.00401969
TMEM200A	-0.281982	0.00390573
TAB2	-0.28185	0.00404037
CH507-396I9.6	-0.281819	0.00392727
SLC8A3	-0.281737	0.00393829
SLC10A3	-0.281729	0.00405668
C3	-0.281688	0.00394476
RP11-13A1.1	-0.281647	0.00395026
KANSL1-AS1	-0.281608	0.00407305
ARL4D	-0.281542	0.004082
RAI14	-0.281531	0.0040835
MAGEC1	-0.281516	0.00396786
PHTF1	-0.281367	0.00410597
TRIOBP	-0.281114	0.00414064
SH3PXD2A	-0.281015	0.00415428
ACE	-0.28095	0.00404445
MAPK10	-0.280908	0.00405027
FMO3	-0.28083	0.00406091
ADAM19	-0.280829	0.00418015
SORCS2	-0.280678	0.00408181
RP1-292L20.3	-0.280618	0.00409003
CMPK1	-0.28051	0.00422461
EFHB	-0.280441	0.0041146
CDCP1	-0.280392	0.00412131
CDK7	-0.280378	0.00424313
NFYAP1	-0.280358	0.00412604
RHOH	-0.280327	0.00413032
AC145343.2	-0.280191	0.00414935
CTD-2201E18.3	-0.280181	0.00427105
TMEM184B	-0.280181	0.00427105
LMO7-AS1	-0.280151	0.004155
HEPACAM2	-0.280089	0.00416361
RP5-1177I5.3	-0.279978	0.00417917
SQRDL	-0.279763	0.00433054
OSMR	-0.279752	0.00433211
CFL2	-0.279719	0.00433684
SZT2-AS1	-0.279622	0.00422953
KDM5A	-0.279566	0.00435897
KDM5C	-0.279511	0.0043669
RP11-1191J2.2	-0.279502	0.00424671
RP11-3J1.1	-0.279488	0.0042487
CLINT1	-0.279313	0.00439555
LY75	-0.279164	0.00429515
LINC01562	-0.279127	0.00430047
GBP4	-0.279001	0.00431873
AC007091.1	-0.278949	0.00432616
CCR5	-0.278941	0.00432738
RP11-752L20.3	-0.278857	0.00433959
LINC01173	-0.278809	0.00434658
CYTIP	-0.278727	0.0043586
RP4-614O4.12	-0.278646	0.00437036
AC016735.2	-0.278534	0.00438675
RTN4	-0.278456	0.00452165
FTLP15	-0.278431	0.00440199
NFE2	-0.278416	0.00440414
RP3-413H6.2	-0.278097	0.00445142
AC114494.1	-0.278004	0.00446524
DROSHA	-0.277951	0.00459753
EXOC3	-0.277852	0.0046125
TM9SF4	-0.277808	0.00461918
RCN1	-0.277753	0.00462753
EMBP1	-0.27772	0.0045079
CSNK2A2	-0.277523	0.00466275
AF127936.9	-0.277416	0.00455379
PDAP1	-0.277402	0.00468129
FAM120C	-0.277347	0.00468974
RP11-378A12.1	-0.277297	0.00457192
IFIH1	-0.27727	0.0047016
CTC-490E21.11	-0.27723	0.00458214
RP11-563P16.1	-0.277211	0.00458497
AP000705.7	-0.277188	0.00458855
HIST1H4E	-0.27711	0.00460052
RP11-93B14.10	-0.277055	0.00460896
RP11-150O12.1	-0.277046	0.00461031
EREG	-0.277044	0.00461057
FBN1	-0.277029	0.00473903
WFDC2	-0.276956	0.00462407
TMEM92-AS1	-0.276691	0.00466501
SH3RF2	-0.276662	0.00466956
TLN1	-0.276622	0.00480258
OSBPL3	-0.276611	0.00480431
TRBV6-5	-0.276555	0.00468622
ZNF699	-0.276545	0.00481469
IGFBP1	-0.276511	0.00469308
IFITM1	-0.276479	0.00482509
SPOCD1	-0.276468	0.00482683
AKTIP	-0.276468	0.00482683
CTC-378H22.2	-0.276384	0.00471292
MAST4	-0.276381	0.00484073
MICALCL	-0.276141	0.0047511
TK2	-0.276117	0.00488266
SNX29	-0.275974	0.0049055
PARP12	-0.275963	0.00490727
CCDC71L	-0.275952	0.00490903
RP1-21O18.3	-0.275928	0.00478487
CTB-89H12.4	-0.275886	0.00491961
TGM4	-0.275846	0.00479781
FSIP2	-0.275733	0.00481587
HLA-DRB5	-0.275707	0.00481999
RP11-135F9.4	-0.275679	0.00482446
RP11-622J8.1	-0.275627	0.00483283
B3GNT9	-0.27559	0.00496749
LINC01127	-0.275394	0.00487025
RP11-131M11.2	-0.275359	0.00500501
LINC01232	-0.275315	0.00501219
HYMAI	-0.275254	0.00489281
CDC42EP4	-0.275238	0.00502477
NHLH1	-0.275161	0.00490791
CTB-181F24.1	-0.275124	0.00491389
RP11-13A1.3	-0.275072	0.00492246
FAM160A1	-0.275019	0.00506087
RFTN1	-0.274975	0.00506812
CFB	-0.274946	0.00494303
PCDHB3	-0.274813	0.00496473
CTD-2541M15.1	-0.274745	0.00497592
VIPR1	-0.274732	0.00497802
AC096649.3	-0.274653	0.00499106
ARHGEF6	-0.27458	0.00500306
RP11-399E6.1	-0.274511	0.00501452
RP11-328J2.1	-0.274476	0.00502027
LDOC1L	-0.274459	0.00515397
CEP120	-0.274316	0.00517795
DST	-0.274206	0.00519646
RNF152	-0.274118	0.00521131
KCTD9P1	-0.274041	0.0050928
NECAB1	-0.27401	0.00509807
EDN1	-0.273955	0.00510722
CCL20	-0.273909	0.00511498
RP11-64C12.1	-0.273864	0.00512262
PIM1	-0.273844	0.00525797
NRG1	-0.273722	0.00514654
TULP1	-0.273683	0.00515327
ZNF812	-0.273617	0.00516445
NT5E	-0.273602	0.00529933
KLHL4	-0.273574	0.00517173
OR8A1	-0.273554	0.00517502
PODXL	-0.27347	0.00532202
ALPI	-0.273376	0.00520556
PRND	-0.273295	0.0052193
TNFAIP8	-0.273294	0.0053524
NGFR	-0.273283	0.0053543
GNRHR2	-0.273174	0.00537337
PIGS	-0.273064	0.00539251
AC061992.2	-0.272946	0.00527946
CTC-345K18.2	-0.272932	0.00528187
KLF7	-0.272822	0.00543481
MEOX1	-0.27272	0.00531881
RP1-140K8.5	-0.272698	0.00532262
AFAP1	-0.272657	0.00546383
ARF4	-0.27257	0.00547936
INSIG2	-0.272548	0.00548325
RP11-734K2.4	-0.272548	0.00548325
FEM1C	-0.272449	0.00550078
CHMP5	-0.272438	0.00550273
KCNJ15	-0.272376	0.00537906
RGS6	-0.272259	0.0053997
TMEM184A	-0.272241	0.00540295
STEAP3	-0.272163	0.0055517
OCSTAMP	-0.272128	0.00542298
TRAF3	-0.272119	0.00555958
AC007238.1	-0.272064	0.00556943
OBFC1	-0.271954	0.00558919
RP11-787B4.2	-0.271939	0.00545658
FAM9C	-0.271867	0.00546944
RGS5	-0.271823	0.00561297
SLC30A4	-0.271823	0.00561297
MFAP3	-0.271812	0.00561496
SH3RF1	-0.271724	0.00563087
RP11-522B15.3	-0.271676	0.00550365
RP1-43E13.2	-0.271592	0.00565482
NCEH1	-0.271581	0.00565682
CD74	-0.271438	0.00568287
SNCAIP	-0.271425	0.00554899
UG0898H09	-0.271418	0.00555024
CXCL3	-0.271407	0.00555223
PEX5L	-0.271363	0.00556011
UNC119B	-0.271317	0.005705
PSG9	-0.271259	0.00557914
RP4-541C22.5	-0.271246	0.0055815
COPB2	-0.27123	0.00572114
CPT1A	-0.271219	0.00572316
OSCAR	-0.27121	0.005588
ACP2	-0.271175	0.00573125
HS3ST3B1	-0.271157	0.00559773
MLLT3	-0.271134	0.00560191
PARVG	-0.27109	0.00560995
PLCB1	-0.271021	0.00575964
KSR1	-0.270977	0.00576777
TEKT4P2	-0.270949	0.00563579
ZHX3	-0.2709	0.00578203
TRAF1	-0.270812	0.00579837
FRMD6-AS2	-0.270751	0.00567227
IKBKE	-0.270702	0.00581884
CTD-2171N6.1	-0.270691	0.0056832
FABP9	-0.270683	0.00568479
FAM171A1	-0.270584	0.00570319
MYH2	-0.270542	0.00571097
NACAD	-0.270538	0.00571157
RP11-366H4.1	-0.270465	0.00572529
BAD	-0.270428	0.00587032
PTRF	-0.270406	0.00587445
RP2	-0.270406	0.00587445
WBP1LP2	-0.270341	0.0057484
TRIM5	-0.27034	0.00588687
FOXS1	-0.270335	0.0057495
EXOC1	-0.270307	0.00589309
LINC01052	-0.2703	0.00575607
ZNF229	-0.270156	0.00578302
SLCO2B1	-0.270107	0.00579232
RP11-39C10.1	-0.270069	0.00579933
FOXD1	-0.270033	0.00594515
RGS3	-0.270033	0.00594515
RP11-340E6.1	-0.270019	0.00580884
PCYT1B	-0.269966	0.00581881
PTPRD	-0.269959	0.00582021
ACBD7	-0.26989	0.00597238
TTC30A	-0.269747	0.00599972
LINC01098	-0.269726	0.00586432
ATXN1	-0.269681	0.00601238
LINC00678	-0.269672	0.00587456
GBF1	-0.269659	0.00601661
MMD	-0.269593	0.00602929
DKK3	-0.269571	0.00603353
PYY	-0.269559	0.00589605
RP11-2N5.2	-0.269453	0.00591651
RP11-128P17.2	-0.269449	0.0059173
ZC3H12A	-0.269231	0.00609951
TPM4	-0.269187	0.00610807
OSBP2	-0.269165	0.00611236
SLC27A6	-0.269056	0.00599295
RNF112	-0.269026	0.00599887
GPN2	-0.269022	0.00614027
TIMP4	-0.268982	0.00600735
RP11-474O21.5	-0.268855	0.00603207
MTCO1P4	-0.268698	0.00606282
SLC35E4	-0.268594	0.00622469
H6PD	-0.268572	0.00622904
IGSF10	-0.26852	0.00609775
PLXNA4	-0.268516	0.00609846
CHRM3-AS2	-0.268453	0.00611091
BCL3	-0.268429	0.00625743
PMAIP1	-0.268363	0.00627057
NEGR1	-0.268242	0.00629472
HLA-DPA1	-0.268209	0.00630132
PTPN14	-0.268165	0.00631014
NKX2-6	-0.268125	0.00617588
AMIGO2	-0.268122	0.00631896
PPME1	-0.26799	0.00634549
IFT22	-0.26788	0.00636768
RP11-671C19.2	-0.267872	0.00622645
AC124861.1	-0.267836	0.00623366
PIM2	-0.267781	0.00638771
PBX3	-0.267759	0.00639217
NEDD4	-0.267737	0.00639663
ATP10D	-0.26755	0.00643466
HOTAIR	-0.267512	0.00629918
STAU1	-0.267485	0.00644813
HLA-E	-0.267353	0.00647514
C2CD3	-0.267287	0.00648869
TNFRSF21	-0.267221	0.00650226
LIN54	-0.267177	0.00651132
AMPD3	-0.267144	0.00651812
RP11-297C4.1	-0.267061	0.00639113
RP11-486O13.5	-0.267041	0.00639522
RP11-813I20.2	-0.267034	0.00639655
FRG2FP	-0.266984	0.00640693
CCL26	-0.266792	0.00644644
TRIML2	-0.266772	0.00645061
AC096772.6	-0.266749	0.00660026
KIAA1671	-0.266716	0.00660714
RP11-60A14.1	-0.266709	0.00646366
RP11-326C3.14	-0.266678	0.00647015
CTD-2384A14.1	-0.26661	0.00648435
B3GAT2	-0.266525	0.00650199
CTD-2325M2.1	-0.266452	0.00666246
XIRP2	-0.266451	0.00651742
CD300E	-0.266375	0.00653335
MMP13	-0.266337	0.00654129
PPP2R5B	-0.26632	0.00669027
HCFC2	-0.266243	0.00670654
EGFLAM	-0.266217	0.00656645
ITGB6	-0.266193	0.00657145
CLSTN1	-0.266167	0.00672285
CXorf22	-0.266039	0.00660394
RP11-1379J22.5	-0.26601	0.00661013
SPATA4	-0.266005	0.00661113
CUL4B	-0.266002	0.00675791
IGBP1	-0.26598	0.0067626
RIOK3	-0.265914	0.00677668
CTD-2547E10.3	-0.265902	0.00663287
NTN4	-0.265793	0.00680256
RP13-516M14.10	-0.265685	0.00667914
RAB33B	-0.265661	0.00683089
KCTD1	-0.26565	0.00683325
AARD	-0.265542	0.00670981
SMTN	-0.265464	0.00687358
KRT79	-0.265423	0.00673524
ZMIZ1-AS1	-0.265382	0.0067441
SCAMP1	-0.265299	0.00690934
C3orf67-AS1	-0.265235	0.0067759
KIAA2026	-0.265079	0.00695727
LHFPL5	-0.265017	0.00682316
TRBV20OR9-2	-0.264814	0.0068673
FAM98A	-0.26475	0.00702973
CNGB1	-0.264681	0.00689652
BDKRB2	-0.264622	0.0069096
FAM19A2	-0.26453	0.0070784
L34079.4	-0.264525	0.00693086
HERC4	-0.264508	0.00708329
PROX1	-0.264492	0.00693805
PSMC2	-0.264453	0.00709551
MIR221	-0.264424	0.00695321
PRR29	-0.264391	0.00696052
GALNT6	-0.264351	0.00696925
CCDC3	-0.264349	0.00696973
C1orf140	-0.264346	0.00697049
RP11-335G20.7	-0.264256	0.00699047
CPAMD8	-0.264213	0.00699999
FGD2	-0.264137	0.00701685
BOLA2B	-0.264078	0.00703003
C1QTNF1-AS1	-0.264016	0.00704402
PRKAG2	-0.263926	0.00721381
GADD45B	-0.263926	0.00721381
SNAP91	-0.263765	0.00710036
RSG1	-0.263739	0.00725612
HCP5	-0.263702	0.00711459
SNX16	-0.263684	0.00726861
ASPH	-0.263476	0.00731623
SMARCA1	-0.263388	0.00733637
GLRX	-0.263377	0.00733889
GABRG1	-0.263367	0.00719053
RELB	-0.263355	0.00734393
MYCN	-0.263348	0.00719484
CARS	-0.263344	0.00734645
SH2B3	-0.263311	0.00735403
GGT8P	-0.263239	0.00721968
RP11-218E20.3	-0.263224	0.00722324
AIM2	-0.263204	0.00722778
CD160	-0.263174	0.00723454
RP11-352D3.2	-0.263111	0.00724899
RP1-151F17.2	-0.26307	0.00725841
KDELR1	-0.262971	0.00743268
RP11-109M17.2	-0.262913	0.00729471
CABP1	-0.262865	0.00730566
CRYBA1	-0.262762	0.00732957
PVRL2	-0.262751	0.00748382
RP11-7F17.7	-0.262698	0.00734443
DOCK2	-0.262677	0.00734925
ITGB1	-0.262663	0.00750437
AC104057.1	-0.26246	0.00739984
CACNA1S	-0.262382	0.00741817
RP11-427M20.1	-0.262256	0.00744768
RP6-201G10.2	-0.262252	0.00744858
CPD	-0.262246	0.00760263
IK	-0.262224	0.00760783
RP11-662I13.2	-0.26218	0.00746545
AP000695.6	-0.262165	0.00746913
RP11-25L3.3	-0.262147	0.00747319
CUBNP3	-0.262098	0.00748484
COL27A1	-0.262076	0.00748998
STC2	-0.262007	0.00750635
PCDHGA1	-0.261949	0.00767314
CSF1	-0.261938	0.00767576
FAT1	-0.261916	0.00768101
CMPK2	-0.26185	0.00769677
BACH1	-0.261763	0.00771783
TERF2IP	-0.261675	0.00773895
XKR4	-0.26164	0.00759359
TMEM106A	-0.261587	0.00776011
F8	-0.261477	0.00778663
RP11-244O19.1	-0.261455	0.00779195
LMO7DN-IT1	-0.261452	0.00763866
SNAPC3	-0.261422	0.00779993
RAB3B	-0.261378	0.00781058
TREM1	-0.261273	0.00768191
AC106869.2	-0.261207	0.00769785
EDIL3	-0.261082	0.00788279
NCOA7	-0.261027	0.00789623
RP1-102E24.6	-0.261025	0.0077419
AP004372.1	-0.260957	0.00775856
EPB41L1	-0.26095	0.00791508
RP11-65M17.3	-0.260931	0.00776494
KDM6A	-0.26084	0.00794207
LINC01094	-0.260788	0.00779972
ATG16L1	-0.260785	0.0079556
PSG1	-0.260774	0.00780334
RP11-536K7.3	-0.260747	0.00780977
ENG	-0.260609	0.00799902
PRICKLE1	-0.260598	0.00800174
AC005754.8	-0.260494	0.00787217
KLHL9	-0.260379	0.00805633
DNASE1L1	-0.260324	0.00807003
RP11-541N10.3	-0.260291	0.00807826
CLCN4	-0.260244	0.00793393
SPAG8	-0.260115	0.00812228
RP11-598F7.6	-0.25976	0.0080552
TMEM244	-0.259728	0.0080633
NXF3	-0.259638	0.00808584
TPBG	-0.259522	0.0082724
HLA-DPB1	-0.259489	0.00828082
FZD2	-0.259489	0.00828082
HMGA1P2	-0.259426	0.0081396
RP11-109E24.1	-0.259403	0.00814546
RPL10L	-0.259393	0.00814812
TNKS1BP1	-0.259324	0.00832299
ZNF18	-0.259193	0.00835686
TMPRSS15	-0.258912	0.00827113
SPANXD	-0.25888	0.00827958
GABRA3	-0.258843	0.00828901
RP11-429J17.4	-0.25875	0.00831315
CLTB	-0.258731	0.00847639
KIF5C	-0.258699	0.00832631
PAH	-0.258527	0.00837094
ZBTB46	-0.258512	0.00853383
FAM53C	-0.258468	0.00854536
RP11-404P21.9	-0.258369	0.0084124
XXyac-YM21GA2.4	-0.25833	0.00842241
ZNF826P	-0.258265	0.00843963
FGD6	-0.258248	0.00860322
SERPINB9P1	-0.258218	0.00845187
CAV1	-0.258204	0.00861483
LINC00087	-0.258174	0.00846346
ITM2B	-0.258149	0.00862937
CAMK2G	-0.258061	0.00865267
PI3	-0.258058	0.00849394
SPNS2	-0.25805	0.00849603
ARPP21	-0.25803	0.00850143
PRSS23	-0.258006	0.00866726
OSBP	-0.257952	0.00868187
LMAN2L	-0.257897	0.00869651
RALGAPA2	-0.25782	0.00871704
KB-1507C5.4	-0.257708	0.00858677
MYHAS	-0.257691	0.00859148
SERPINE1	-0.257688	0.00875232
H1FOO	-0.257615	0.00861162
AF127936.7	-0.257496	0.0086434
TNFSF10	-0.257471	0.00865019
NMT2	-0.257468	0.00881142
MYCNOS	-0.257425	0.00866251
RP11-517O13.1	-0.257352	0.0086823
AC012501.2	-0.257319	0.00869114
LINC00452	-0.257314	0.00869249
CRIM1	-0.25715	0.00889773
DCSTAMP	-0.257017	0.00877278
TNFAIP2	-0.257008	0.00877528
RP11-867G23.10	-0.256878	0.00881053
SLC35E1	-0.256732	0.00901195
RP3-467K16.4	-0.256725	0.0088523
CADM3	-0.256714	0.00885538
AC093166.4	-0.256689	0.00886224
RP11-91K9.1	-0.256687	0.00886285
GLIS2	-0.256656	0.00903314
LINC01029	-0.256653	0.0088721
SPIN1	-0.256568	0.0090574
SPATS2L	-0.256546	0.00906347
RP11-96B2.1	-0.256475	0.00892112
RP11-437J19.1	-0.256394	0.00894345
LMAN2	-0.256381	0.00910915
RP11-395F4.1	-0.256374	0.00894882
PDE4DIP	-0.25637	0.0091122
OAS2	-0.256283	0.00897412
MALT1	-0.256249	0.00914583
CALHM3	-0.256156	0.00900939
TRAV38-1	-0.256108	0.00902279
NEURL1	-0.256098	0.00902542
XXbac-BPG248L24.12	-0.256069	0.00903352
TM9SF1	-0.256041	0.00920418
GNA12	-0.25603	0.00920726
OR4P1P	-0.255984	0.00905739
LINC00971	-0.255935	0.00907103
PLBD2	-0.25592	0.00923811
BRPF3	-0.255832	0.00926286
RP11-894J14.5	-0.255745	0.00912431
CEP44	-0.2557	0.00930009
AKAP11	-0.2557	0.00930009
PDGFB	-0.255687	0.00914046
LINC01258	-0.25568	0.00914259
RHBDL1	-0.255657	0.00914904
AC104777.4	-0.255561	0.00917598
RP11-536P16.4	-0.25556	0.00917624
SERPIND1	-0.255556	0.00917762
CLPSL2	-0.255509	0.00919081
LRP10	-0.255272	0.009422
CTD-2647E9.1	-0.255243	0.00926637
IFT20	-0.255162	0.00945349
AC104777.3	-0.255159	0.00929039
U47924.31	-0.255151	0.00945664
ZNF32-AS1	-0.255112	0.0093036
PTX3	-0.255022	0.00932948
KRT37	-0.254974	0.00934329
RGL1	-0.254898	0.00952943
HDAC8	-0.254876	0.00953578
GVINP1	-0.254839	0.00938197
ZNF529-AS1	-0.25481	0.00955486
AC124789.1	-0.254788	0.00939669
ABLIM3	-0.254777	0.00956441
AC005592.3	-0.254671	0.00943056
ARHGAP20	-0.254669	0.00943109
ELOVL4	-0.254514	0.00964114
TFAP2C	-0.254492	0.00964756
AOX1	-0.254483	0.00948505
TMEM158	-0.254448	0.00966041
IQCD	-0.254316	0.00969904
TTC25	-0.254305	0.00970227
SAP30L	-0.254239	0.00972164
TNPO3	-0.254162	0.00974429
AP000472.3	-0.254127	0.00958913
LINC01249	-0.254032	0.00961707
FAM105A	-0.253942	0.00964373
TMEM132B	-0.253889	0.00965931
NAV3	-0.253877	0.00982881
AGPAT4	-0.253855	0.00983534
F2R	-0.2538	0.00985168
PHLDB2	-0.253745	0.00986804
GLT8D1	-0.253734	0.00987131
DPPA2	-0.253723	0.00970856
CDKN1A	-0.253679	0.0098877
ZFAND3	-0.253514	0.00993702
CDKN2B	-0.253462	0.00978612
KRT33B	-0.253451	0.00978955
RASA1	-0.253416	0.00996671
AC090283.3	-0.253304	0.00983353
PINK1-AS	-0.253273	0.0100097
RP1-228H13.5	-0.253273	0.0100097
NOL4L	-0.253185	0.0100363
SPNS3	-0.253163	0.00987579
PITPNM2	-0.253163	0.0100429
PVRL3-AS1	-0.253098	0.00989544
FTX	-0.253097	0.0100629
ZBTB7C	-0.252995	0.00992659
COX10-AS1	-0.252987	0.0100963
GYPE	-0.252941	0.00994288
SYF2	-0.252866	0.0101331
ARHGDIB	-0.252829	0.00997711
CDA	-0.252728	0.0100077
HIPK2	-0.252691	0.0101868
CNR1	-0.252669	0.0100259
MYRFL	-0.252659	0.0100289
TNIP1	-0.252581	0.0102206
TSIX	-0.252566	0.0100574
SNRK-AS1	-0.25254	0.0100653
MAGI1	-0.252482	0.010251
RALA	-0.252482	0.010251
IFIT1	-0.252438	0.0102646
AFF4	-0.252405	0.0102747
HIST1H4H	-0.252362	0.0101199
PHAX	-0.25235	0.0102917
RP11-1090M7.1	-0.252296	0.0101401
RP11-102K13.5	-0.252279	0.0101454
FDCSP	-0.252099	0.0102013
RP11-805F19.3	-0.252083	0.0102062
CNTLN	-0.252076	0.010377
TCAF2P1	-0.252058	0.0102139
RP11-332J15.1	-0.252049	0.0102166
UCKL1-AS1	-0.25192	0.0102569
ZCCHC6	-0.251856	0.0104456
AKR1C7P	-0.25184	0.0102819
RP11-1024P17.1	-0.251832	0.0102842
TSPAN5	-0.251724	0.010487
ADAMTS6	-0.251669	0.0105043
HIST2H2BC	-0.251664	0.0103368
SPINK5	-0.251532	0.0103783
MTMR7	-0.251521	0.0103817
GOSR1	-0.251461	0.0105702
ENTPD4	-0.25145	0.0105737
GLP1R	-0.25142	0.0104137
TSR2	-0.251384	0.0105946
NAALAD2	-0.251362	0.0104318
LINC00385	-0.25135	0.0104357
RP11-446J8.1	-0.251283	0.0104568
ENPP7P7	-0.251274	0.0104598
C5orf66	-0.251209	0.0104805
SNIP1	-0.25101	0.0107137
PPP1R12A	-0.250977	0.0107243
PAPSS1	-0.250955	0.0107313
CAV2	-0.250912	0.0107454
RP11-175G14.2	-0.250736	0.0106314
XXbac-BPG181B23.7	-0.250725	0.0108056
SS18	-0.250714	0.0108091
FBXO8	-0.250692	0.0108162
RP11-382F24.1	-0.250612	0.0106713
TTC7A	-0.250604	0.0108446
RP11-520D19.2	-0.25054	0.0106948
TCP11L2	-0.250494	0.0108803
VASN	-0.250439	0.0108981
APOL2	-0.250428	0.0109017
KRBOX4	-0.250428	0.0109017
VCAN	-0.250406	0.0109089
PRKG1-AS1	-0.250369	0.0107502
GATS	-0.250362	0.0109232
SNTB1	-0.250318	0.0109375
SYT12	-0.250284	0.0107777
RP11-320P7.2	-0.25026	0.0107856
RP11-59D5__B.2	-0.2502	0.010805
CCDC126	-0.250165	0.0109878
CTD-2553L13.9	-0.250078	0.010845
FAM188B	-0.25004	0.0108574
LYPD6	-0.24999	0.0108736
RP11-449D8.1	-0.249968	0.0108811
RP1-156L9.1	-0.249922	0.0108959
CYP4X1	-0.249899	0.0109035
IPCEF1	-0.249851	0.0109192
LRFN5	-0.249792	0.0109388
SPACA6P	-0.249688	0.0109732
RP11-556E13.1	-0.249679	0.0109761
SCP2	-0.249671	0.0111508
AC007405.8	-0.249612	0.0109984
AFP	-0.249597	0.0110031
PSTPIP2	-0.249596	0.0110037
ESM1	-0.24953	0.0110256
LPCAT2	-0.249506	0.0112056
AP000233.3	-0.249468	0.0110459
DPF3	-0.249443	0.0110543
ANKRA2	-0.249374	0.0112496
PLP2	-0.249352	0.011257
LPCAT3	-0.249308	0.0112717
TMEM189	-0.249275	0.0112828
AP000476.1	-0.249211	0.0111318
FAM196B	-0.249157	0.0111498
RUFY2	-0.249154	0.0113233
ITGB2-AS1	-0.249062	0.0111816
PIGQ	-0.248968	0.0113863
LINC00401	-0.248946	0.0112207
SPCS3	-0.248924	0.0114012
RRM2B	-0.24888	0.0114161
SPINK6	-0.248861	0.0112494
PODNL1	-0.248806	0.011268
MIR181A1HG	-0.248781	0.0112764
RP11-274H2.3	-0.248706	0.0113019
RP11-148B18.3	-0.248685	0.0113092
VPS13D	-0.248583	0.0115169
PDE7B	-0.248572	0.0115207
CDH8	-0.248558	0.0113522
ZFHX4-AS1	-0.248523	0.0113642
EXOC3-AS1	-0.248506	0.0115432
SLC41A1	-0.248495	0.011547
FLNB	-0.248353	0.011596
CXCL10	-0.248333	0.0114291
PCLO	-0.248276	0.0116224
SEC22B	-0.248258	0.0114548
GINM1	-0.248221	0.0116413
SCML1	-0.248166	0.0116603
CCDC102B	-0.248144	0.0116678
TPSG1	-0.248138	0.011496
AC006273.5	-0.248061	0.0115224
RP11-533E19.5	-0.248007	0.0115412
CCDC152	-0.247907	0.0115758
CTD-2650P22.2	-0.24782	0.011606
MED12L	-0.247667	0.011659
TRIM8	-0.247639	0.0118435
RAB12	-0.247606	0.0118551
RBM47	-0.247601	0.0116822
RTCA-AS1	-0.247593	0.0116848
ATP6V1B1	-0.247474	0.0119013
GPR173	-0.247443	0.0117373
PAGE5	-0.247394	0.0117547
RP11-563N12.2	-0.247386	0.0117575
SPEG	-0.247375	0.0119361
KRT9	-0.247302	0.0117869
GABRG2	-0.247297	0.0117887
TMED7	-0.247265	0.0119748
NHEG1	-0.247063	0.0118713
C2orf27A	-0.247057	0.0120488
HERC6	-0.247002	0.0120683
STK19	-0.246991	0.0120722
RP11-132E11.2	-0.246987	0.0118983
KCNMB2	-0.246982	0.0118999
RP3-523K23.2	-0.246972	0.0119036
LTBP3	-0.246936	0.0120918
AKR1B1P1	-0.246899	0.0119295
RBMS3-AS3	-0.246812	0.0119606
C7	-0.246785	0.0119702
DIRC3	-0.246736	0.0119876
CAB39	-0.246628	0.0122018
AC144831.1	-0.246342	0.0121289
GRAMD4P7	-0.246307	0.0121418
BARX1-AS1	-0.246303	0.012143
USP15	-0.246299	0.0123207
LST1	-0.246287	0.0121489
FAM35DP	-0.246284	0.0121498
VIT	-0.246259	0.012159
RP11-388M20.2	-0.246162	0.0121939
PCDHB7	-0.246146	0.0122
RP11-876N24.5	-0.246134	0.0123805
DNAH8	-0.246083	0.0122229
IFITM3	-0.246057	0.0124085
HAS1	-0.245979	0.0122607
IL7	-0.245872	0.0122996
EML5	-0.245851	0.0123072
CTD-2186M15.3	-0.24575	0.0125211
B3GNT5	-0.245728	0.0125292
PSD3	-0.245684	0.0125453
PSME4	-0.245662	0.0125534
RP11-116O18.1	-0.245639	0.0123848
CCDC153	-0.245621	0.0123917
TMEM59	-0.245618	0.0125696
RP11-134O21.1	-0.245603	0.0123981
RP11-374M1.7	-0.245602	0.0123986
CALCOCO2	-0.24553	0.012602
CHN1	-0.245497	0.0126142
KCNG1	-0.245486	0.0126183
TSPEAR	-0.245432	0.0124611
LMO7DN	-0.245411	0.012469
ING4	-0.245409	0.0126468
TMEM132A	-0.24531	0.0126834
SAMSN1	-0.245248	0.0125294
PRDM8	-0.245223	0.0127161
CD99L2	-0.24519	0.0127284
RP1-151F17.1	-0.245124	0.012753
CCDC184	-0.245042	0.0126059
RP11-192H23.6	-0.245017	0.0126152
OTULIN	-0.245003	0.0127982
ZCCHC5	-0.244962	0.0126359
RBMS2	-0.244893	0.0128394
PLA2G3	-0.244889	0.0126631
RNU1-70P	-0.244881	0.0126663
SH3GLB1	-0.244849	0.0128559
NFAT5	-0.244827	0.0128642
ARHGAP22	-0.244772	0.0128848
SEC14L1	-0.244772	0.0128848
TVP23A	-0.244754	0.0127139
RGAG1	-0.244734	0.0127211
RP11-314O13.1	-0.244705	0.0127323
COL22A1	-0.244643	0.0127555
RP11-91J3.2	-0.244618	0.012765
TPRG1	-0.244581	0.0127789
RP3-388N13.3	-0.244577	0.0127804
SLC8A1-AS1	-0.244565	0.0127848
ITGB1P1	-0.244542	0.012972
IL15	-0.244404	0.0128459
CTD-2532K18.2	-0.244397	0.0128486
TMEM8B	-0.244366	0.0130388
GRID2	-0.244261	0.0129004
FAM107A	-0.244257	0.0129019
CORIN	-0.24424	0.0129082
PDCD1LG2	-0.244219	0.0129161
ROCK2	-0.244047	0.0131605
TBL1X	-0.244047	0.0131605
PCDHGB2	-0.243992	0.0131816
KB-1732A1.1	-0.243992	0.0131816
RP11-143M1.3	-0.243972	0.0130107
VSTM4	-0.243939	0.0130235
RAB40C	-0.243916	0.0132112
TIMP3	-0.243911	0.0130342
LRIG1	-0.243883	0.0132239
RBMS3	-0.243795	0.0132578
TOR1B	-0.243707	0.0132918
NRXN1	-0.243664	0.0131292
CDKN2D	-0.243542	0.0133557
TGFBI	-0.24352	0.0133642
MAP3K2	-0.243498	0.0133728
ZBTB17	-0.243465	0.0133856
CAST	-0.243388	0.0134156
MAML1	-0.243257	0.0134671
FAM71F1	-0.243231	0.0132976
TBXAS1	-0.24318	0.0133174
CLIC4	-0.242916	0.013601
DIRC3-AS1	-0.242914	0.0134221
CYP3A7	-0.24287	0.0134392
PNPLA8	-0.242784	0.0136532
IL17REL	-0.242763	0.0134815
HSP90B2P	-0.242736	0.0134923
C2orf82	-0.242696	0.0136881
ZYX	-0.242631	0.0137143
PAFAH2	-0.242565	0.0137405
MAPK6	-0.242488	0.0137712
NXPE3	-0.242367	0.0138195
ARCN1	-0.242312	0.0138415
RP11-495K9.2	-0.242134	0.0137324
RP11-454C18.1	-0.242007	0.0137835
C15orf52	-0.241994	0.0139698
POLR2C	-0.241994	0.0139698
TMEM171	-0.241974	0.0137968
SPEM1	-0.241799	0.0138678
LINC01460	-0.241755	0.0138856
MORF4L2	-0.241752	0.0140678
USP27X-AS1	-0.241697	0.0140901
RP11-348B17.1	-0.241695	0.0139097
TCF7	-0.241631	0.014117
CTB-33O18.1	-0.241625	0.0139384
NUAK2	-0.241587	0.0141349
TNIP3	-0.241528	0.0139779
ZMIZ1	-0.241521	0.0141619
TLR5	-0.241481	0.0139972
CD70	-0.241475	0.0139995
RP11-658F2.8	-0.241379	0.0142204
TRIM55	-0.241304	0.0140696
GABARAPL1	-0.241302	0.014252
PDIA4	-0.241269	0.0142656
B3GALT2	-0.241265	0.0140858
ITGA8	-0.241232	0.0140991
HCG4P5	-0.241214	0.0142882
MANBAL	-0.24117	0.0143063
KRT73-AS1	-0.241163	0.0141274
RP11-537P22.2	-0.241162	0.0141281
PRSS35	-0.241145	0.0141349
AC007319.1	-0.241018	0.0141876
TBC1D25	-0.240961	0.0143927
NFXL1	-0.240917	0.014411
SERPINB9	-0.240902	0.0142355
ANKRD29	-0.240894	0.0142387
CLPS	-0.240726	0.0143085
C10orf54	-0.240698	0.0145025
BAGE5	-0.240697	0.0143209
RP11-340A13.2	-0.240617	0.0143541
DGAT2L6	-0.240589	0.0143659
ABC14-1080714F14.1	-0.240542	0.0143855
DAB1	-0.240462	0.0144189
HM13	-0.240423	0.0146176
FUCA1	-0.240368	0.0146407
AOAH	-0.240356	0.0144634
ASAH2B	-0.240341	0.0144697
HMGA1P3	-0.240309	0.0144834
CLIC4P1	-0.240259	0.0145042
RP11-215P8.1	-0.240252	0.0145074
ZNF674-AS1	-0.240236	0.0146963
RSPH3	-0.24017	0.0147242
NPAP1	-0.240167	0.0145431
CFAP45	-0.240072	0.0145833
XXYLT1-AS1	-0.240069	0.0145846
MAGI3	-0.240061	0.0147708
PSG7	-0.240052	0.014592
RP11-813N20.1	-0.240047	0.0145938
CDHR2	-0.240017	0.0146066
RP11-395B7.4	-0.240009	0.0146102
LA16c-306A4.2	-0.239965	0.0146286
GBP1P1	-0.239962	0.0146302
PDPK1	-0.239951	0.0148174
RP11-626G11.5	-0.239941	0.0146388
RP11-445P17.8	-0.23987	0.0146692
CNOT4	-0.239841	0.0148643
CHST15	-0.239748	0.0147214
PRICKLE2	-0.239731	0.0149112
SRPR	-0.239731	0.0149112
SCN4A	-0.239706	0.0147393
FAM135B	-0.239661	0.0147584
SEC61A1	-0.239654	0.0149441
PCDH9-AS2	-0.239561	0.0148013
IL11	-0.239548	0.0148066
FHL2	-0.239544	0.0149913
LINC00887	-0.239489	0.014832
RP11-347H15.1	-0.239457	0.014846
LNX1-AS2	-0.239429	0.0148578
SAA2	-0.239411	0.0148658
TFPI	-0.239402	0.0150528
RP11-594N15.3	-0.239373	0.014882
AOC3	-0.239369	0.015067
MICA	-0.239358	0.0150718
RP11-379B8.1	-0.239263	0.0149296
NID2	-0.239192	0.0149604
NUGGC	-0.239174	0.0149681
RP11-945A11.1	-0.23916	0.014974
SAGE1	-0.239153	0.0149771
GLYATL1	-0.239138	0.0149836
IGHMBP2	-0.239116	0.0151765
GPC6	-0.239105	0.0151813
FENDRR	-0.239091	0.0150042
FOXL1	-0.23908	0.0150088
MAPK13	-0.239035	0.0150283
BTF3P11	-0.23893	0.015074
RAET1E	-0.238888	0.0150926
RP11-135L13.4	-0.238853	0.0151076
CTC-441N14.4	-0.238837	0.0151149
EVC	-0.23882	0.0153059
LOC124685	-0.238804	0.015129
AC005355.2	-0.238799	0.0151313
GPR75-ASB3	-0.238798	0.0153155
CCDC144CP	-0.238778	0.0151405
LRRTM3	-0.23876	0.0151484
ZBED2	-0.238744	0.0151554
AC073130.3	-0.238699	0.015175
FAM96B	-0.238699	0.0153588
[truncated: 25,159 more rows]

## Sheet: D
Copy number alterations (CNA) across the three immune subgroups
	High Immune	Inter. Immune	Low Immune	Total CNA	P	pathway	comment
TOTAL (N)	64	116	96
MYC
No change (N)	57	93	68	218
No change (%)	89.06	80.17	70.83	78.99
Amplification (N)	7	23	28	58
Amplifiaction (%)	10.94	19.83	29.17	21.01	0.02
NFKB1						NF-kB signalling
No change (N)	63	112	82	257
No change (%)	98.44	96.55	85.42	93.12
Amplification (N)	1	2	1	4
Amplification (%)	1.56	1.72	1.04	1.45
Deletion (N)	0	2	13	15
Deletion (%)	0	1.72	13.54	5.43	0.0003
NFKB2						NF-kB signalling
No change (N)	58	87	59	204
No change (%)	90.62	75	61.46	73.91
Amplification (N)	0	1	0	1
Amplification (%)	0	0.86	0	0.36
Deletion (N)	6	28	37	71
Deletion (%)	9.38	24.14	38.54	25.72	0.0001
CHUK						NF-kB signalling
No change (N)	59	93	63	215
No change (%)	92.19	80.87	65.62	78.18
Deletion (N)	5	22	33	60
Deletion (%)	7.81	19.13	34.38	21.82	0.0002
IRAK2						NF-kB signalling
No change (N)	63	109	87	259
No change (%)	98.44	93.97	90.62	93.84
Amplification (N)	1	0	1	2
Amplification (%)	1.56	0	1.04	0.72
Deletion (N)	0	7	8	15
Deletion (%)	0	6.03	8.33	5.43	0.04
MAP3K14						NF-kB signalling
No change (N)	63	106	86	255
No change (%)	98.44	91.38	89.58	92.39
Amplification (N)	1	4	3	8
Amplification (%)	1.56	3.45	3.12	2.9
Deletion (N)	0	6	7	13
Deletion (%)	0	5.17	7.29	4.71	0.2
MYD88						NF-kB signalling
No change (N)	62	108	87	257
No change (%)	96.88	93.1	90.62	93.12
Amplification (N)	2	2	0	4
Amplification (%)	3.12	1.72	0	1.45
Deletion (N)	0	6	9	15
Deletion (%)	0	5.17	9.38	5.43	0.02
MAP3K7						NF-kB signalling
No change (N)	61	98	64	223
No change (%)	95.31	84.48	66.67	80.8
Amplification (N)	0	3	3	6
Amplification (%)	0	2.59	3.12	2.17
Deletion (N)	3	15	29	47
Deletion (%)	4.69	12.93	30.21	17.03	5e-05
REL						NF-kB signalling
No change (N)	62	103	85	250
No change (%)	96.88	88.79	88.54	90.58
Amplification (N)	2	11	8	21
Amplification (%)	3.12	9.48	8.33	7.61
Deletion (N)	0	2	3	5
Deletion (%)	0	1.72	3.12	1.81	0.3
RELB						NF-kB signalling
No change (N)	61	108	87	256
No change (%)	95.31	93.1	90.62	92.75
Amplification (N)	3	8	8	19
Amplification (%)	4.69	6.9	8.33	6.88
Deletion (N)	0	0	1	1
Deletion (%)	0	0	1.04	0.36	0.7
RELA						NF-kB signalling
No change (N)	58	103	80	241
No change (%)	90.62	88.79	83.33	87.32
Amplification (N)	4	3	3	10
Amplification (%)	6.25	2.59	3.12	3.62
Deletion (N)	2	10	13	25
Deletion (%)	3.12	8.62	13.54	9.06	0.1
IKBKB						NF-kB signalling
No change (N)	63	103	73	239
No change (%)	98.44	88.79	76.04	86.59
Amplification (N)	1	8	13	22
Amplification (%)	1.56	6.9	13.54	7.97
Deletion (N)	0	5	10	15
Deletion (%)	0	4.31	10.42	5.43	0.001		both ampl and del in the low immune
NFKBIA						NF-kB signalling
No change (N)	55	100	79	234
No change (%)	85.94	86.21	82.29	84.78
Amplification (N)	6	6	6	18
Amplification (%)	9.38	5.17	6.25	6.52
Deletion (N)	3	10	11	24
Deletion (%)	4.69	8.62	11.46	8.7	0.5
JAK2						IFN-y signaling
No change (N)	63	113	71	247
No change (%)	98.44	97.41	73.96	89.49
Amplification (N)	0	0	1	1
Amplification (%)	0	0	1.04	0.36
Deletion (N)	1	3	24	28
Deletion (%)	1.56	2.59	25	10.14	2x10E-8
STAT1						IFN-y signaling
No change (N)	56	109	91	256
No change (%)	87.5	93.97	94.79	92.75
Amplification (N)	6	4	0	10
Amplification (%)	9.38	3.45	0	3.62
Deletion (N)	2	3	5	10
Deletion (%)	3.12	2.59	5.21	3.62	0.02
JAK1						IFN-y signaling
No change (N)	62	106	80	248
No change (%)	96.88	91.38	83.33	89.86
Amplification (N)	2	5	11	18
Amplification (%)	3.12	4.31	11.46	6.52
Deletion (N)	0	5	5	10
Deletion (%)	0	4.31	5.21	3.62	0.05
IFNG						IFN-y signaling
No change (N)	60	107	83	250
No change (%)	93.75	92.24	86.46	90.58
Amplification (N)	1	5	4	10
Amplification (%)	1.56	4.31	4.17	3.62
Deletion (N)	3	4	9	16
Deletion (%)	4.69	3.45	9.38	5.8	0.4
CTNNB1
No change (N)	63	102	85	250
No change (%)	98.44	87.93	88.54	90.58
Amplification (N)	1	6	1	8
Amplification (%)	1.56	5.17	1.04	2.9
Deletion (N)	0	8	10	18
Deletion (%)	0	6.9	10.42	6.52	0.016	more deleletions in the low immune

## Sheet: E
Univarable CNA survival analysis
CNA	Haz. Ratio	Std. Err.	z	P>z	[95% Conf.	Interval]
MYC	1.78567	0.363754	2.85	0.004	1.19786	2.66193
NFKB1	1.67195	0.255979	3.36	0.001	1.23852	2.25706
NFKB2	1.22166	0.121421	2.01	0.044	1.00543	1.4844
CHUK	1.31907	0.134818	2.71	0.007	1.07961	1.61163
IRAK2	1.39642	0.231684	2.01	0.044	1.00876	1.93304
MYD88	1.57304	0.25048	2.84	0.004	1.15133	2.14921
MAP3K7	1.24074	0.138714	1.93	0.054	0.996591	1.5447
JAK2	1.513	0.194605	3.22	0.001	1.17586	1.9468
STAT1	1.04229	0.265423	0.16	0.871	0.632741	1.71692

## Sheet: F
Multivariable CNA survival analysis								Differential gene expresion.
CNA	Haz. Ratio	Std. Err.	z	P>z	[95% Conf.	Interval]		Change in gene expression in CNA vs no alteration
								Fold change	P
MYC	1.76107	0.363586	2.74	0.006	1.17501	2.63945		0.8	0.0006
ajccstage	2.17161	0.330016	5.1	0	1.61222	2.92508
NFKB1	1.51571	0.234807	2.68	0.007	1.11879	2.05343		1.2	0.008
ajccstage	2.15394	0.329388	5.02	0	1.59612	2.90672
Ampl_MYC_Del_NFKB1	3.6976	1.57473	3.07	0.002	1.60476	8.51981
ajccstage	1.90903	0.340309	3.63	0	1.3461	2.70739
NFKB2	1.162	0.116966	1.49	0.136	0.953952	1.41543		1.6	1.5x10-11
ajccstage	2.11263	0.322738	4.9	0	1.56599	2.85009
CHUK	1.30871	0.134487	2.62	0.009	1.06997	1.60072		1.2	0.004
ajccstage	2.16532	0.332775	5.03	0	1.60216	2.92643
IRAK2	1.37926	0.229117	1.94	0.053	0.995972	1.91004		1.7	0.003
ajccstage	2.11932	0.322243	4.94	0	1.57316	2.85511
MYD88	1.49067	0.238683	2.49	0.013	1.08916	2.04021		1.2	0.02
ajccstage	2.09283	0.320163	4.83	0	1.55066	2.82457
MAP3K7	1.14189	0.132332	1.14	0.252	0.909871	1.43308		1.2	4.8x10-10
ajccstage	2.11925	0.328127	4.85	0	1.56455	2.87061
JAK2	1.40343	0.182219	2.61	0.009	1.0881	1.81012		1.9	2.8x10-9
ajccstage	2.09529	0.322115	4.81	0	1.5502	2.83206
STAT1	0.970949	0.247444	-0.12	0.908	0.58921	1.60001		1.1	0.7
ajccstage	2.10497	0.321499	4.87	0	1.56041	2.83957

## Sheet: G
Multivariable survival analysis within the three immune subgroups including "duration of smoking" variable
OVERALL
Predictor	HR	Std. Err.	z	P>z	[95% Conf.	Interval]
AJCC stage	2.02773	0.26099	5.49	0	1.57562	2.60957
Duration of smoking (years)	1.01516	0.0052708	2.9	0.004	1.00488	1.02554
Site (limbs vs rest)	1.65248	0.324537	2.56	0.011	1.12451	2.42832
Age at diagnosis	1.03281	0.0082461	4.04	0	1.01677	1.0491
Gender	0.914189	0.16576	-0.49	0.621	0.640763	1.30429
Mitotic number	1.01805	0.0063213	2.88	0.004	1.00573	1.03051
Inter. cluster vs Low	0.807941	0.151309	-1.14	0.255	0.559719	1.16625
High cluster vs Low	0.646158	0.161472	-1.75	0.081	0.395938	1.05451
LOW IMMUNE
Predictor	HR	Std. Err.	z	P>z	[95% Conf.	Interval]
AJCC stage	1.95064	0.357744	3.64	0	1.36166	2.79438
Duration of smoking (years)	1.00866	0.0072391	1.2	0.229	0.994573	1.02295
Site (limbs vs rest)	1.77542	0.491689	2.07	0.038	1.03173	3.05516
Age at diagnosis	1.03156	0.0114782	2.79	0.005	1.0093	1.0543
Mitotic number	1.0096	0.0085629	1.13	0.26	0.992956	1.02652
INTERMEDIATE IMMUNE
Predicotr	HR	Std. Err.	z	P>z	[95% Conf.	Interval]
AJCC stage	1.73847	0.384249	2.5	0.012	1.12728	2.68106
Duration of smoking (years)	1.01264	0.0097816	1.3	0.193	0.993649	1.03199
Site (limbs vs rest)	1.43438	0.434777	1.19	0.234	0.79187	2.5982
Age at diagnosis	1.03139	0.0141777	2.25	0.025	1.00398	1.05956
Mitotic number	1.03764	0.0106301	3.61	0	1.01702	1.05869
HIGH IMMUNE
Predictor	HR	Std. Err.	z	P>z	[95% Conf.	Interval]
AJCC stage	3.1386	1.12614	3.19	0.001	1.55354	6.34087
Duration of smoking (years)	1.03524	0.011415	3.14	0.002	1.0131	1.05785
Site (limbs vs rest)	1.97159	1.0368	1.29	0.197	0.703386	5.52635
Age at diagnosis	1.04423	0.0237625	1.9	0.057	0.998683	1.09186
Mitotic number	1.04185	0.04604	0.93	0.354	0.955409	1.13611

## Sheet: H
Multivariable survival analysis within the three immune subgroups including "packs per year" of smoking variable
OVERALL
Predictor	HR	Std. Err.	z	P>z	[95% Conf.	Interval]
AJCC stage	2.13125	0.280343	5.75	0	1.6469	2.75804
Packs per year	1.01669	0.0048377	3.48	0.001	1.00725	1.02622
Site (limbs vs rest)	1.64545	0.317112	2.58	0.01	1.12783	2.40065
Age at diagnosis	1.02541	0.0079525	3.24	0.001	1.00994	1.04112
Gender	0.974367	0.181689	-0.14	0.889	0.676084	1.40425
Mitotic number	1.01483	0.0070731	2.11	0.035	1.00106	1.02879
Inter. cluster vs Low	0.791841	0.148691	-1.24	0.214	0.548025	1.14413
High cluster vs Low	0.574885	0.147569	-2.16	0.031	0.347602	0.950777
LOW IMMUNE
Predictor	HR	Std. Err.	z	P>z	[95% Conf.	Interval]
AJCC syage	1.97542	0.358168	3.75	0	1.38461	2.81834
Packs per year	1.01492	0.0063206	2.38	0.017	1.00261	1.02738
Site (limbs vs rest)	1.98165	0.557399	2.43	0.015	1.14183	3.43917
Age at diagnosis	1.02326	0.0110303	2.13	0.033	1.00187	1.04511
Mitotic number	1.00335	0.0098704	0.34	0.734	0.984195	1.02289
INTERMADIATE IMMUNE
Predictor	HR	Std. Err.	z	P>z	[95% Conf.	Interval]
AJCC syage	1.88654	0.440491	2.72	0.007	1.19376	2.98136
Packs per year	1.01839	0.0108223	1.71	0.086	0.997393	1.03982
Site (limbs vs rest)	1.43723	0.424821	1.23	0.22	0.805242	2.56523
Age at diagnosis	1.02734	0.0134912	2.05	0.04	1.00123	1.05412
Mitotic number	1.03423	0.01082	3.22	0.001	1.01324	1.05566
HIGH IMMUNE
Predicotr	HR	Std. Err.	z	P>z	[95% Conf.	Interval]
AJCC syage	4.28438	1.7424	3.58	0	1.9307	9.50738
Packs per year	1.02838	0.0115788	2.49	0.013	1.00593	1.05132
Site (limbs vs rest)	1.50055	0.764681	0.8	0.426	0.552687	4.07402
Age at diagnosis	1.03539	0.0220313	1.63	0.102	0.993099	1.07949
Mitotic number	1.02943	0.0452009	0.66	0.509	0.94454	1.12194
